# Supplementary material for: In silico screening by AlphaFold2 program revealed the potential binding partners of nuage-localizing proteins and piRNA-related proteins
Source: bioRxiv preprint, doi:10.1101/2024.07.28.605023, version 2 (2025-01-28)
Supplement: Supplementary Table S7 [file 605023_file11.xlsx]

## Sheet: piwi_all_screening_result_list_
Supplemental Table S7
The AlphaFold2 screen for Piwi interacting pairs against 12,427 Drosophila proteins.
protA	length_A	protB	length_B	ranking confidence	ptm	iptm	ratio(iptm/ptm)
CG34283	153	piwi	843	0.85	0.84	0.85	1.0119
CG32625	144	piwi	843	0.84	0.84	0.84	1
arx	167	piwi	843	0.83	0.84	0.83	0.988095
CG33703	181	piwi	843	0.82	0.84	0.81	0.964286
GstE12	223	piwi	843	0.82	0.8	0.83	1.0375
CAH4	279	piwi	843	0.81	0.82	0.8	0.97561
CG13192	323	piwi	843	0.81	0.8	0.82	1.025
mael	462	piwi	843	0.79	0.8	0.78	0.975
Adk3	366	piwi	843	0.78	0.79	0.77	0.974684
Alg11	475	piwi	843	0.78	0.8	0.77	0.9625
CG41378	228	piwi	843	0.78	0.8	0.78	0.975
CG14036	93	piwi	843	0.77	0.83	0.76	0.915663
CG7966	486	piwi	843	0.77	0.78	0.77	0.987179
Hen1	391	piwi	843	0.77	0.77	0.77	1
Rpp14b	112	piwi	843	0.77	0.83	0.76	0.915663
CG33783	164	piwi	843	0.76	0.8	0.76	0.95
AANATL4	224	piwi	843	0.75	0.82	0.74	0.902439
CG14787	260	piwi	843	0.75	0.76	0.75	0.986842
CG33160	258	piwi	843	0.75	0.67	0.77	1.14925
CG3397	342	piwi	843	0.75	0.79	0.74	0.936709
CG4390	330	piwi	843	0.75	0.79	0.74	0.936709
CG7142	334	piwi	843	0.75	0.8	0.73	0.9125
janA	135	piwi	843	0.75	0.83	0.73	0.879518
yip7	270	piwi	843	0.75	0.72	0.75	1.04167
CG14294	139	piwi	843	0.74	0.79	0.73	0.924051
CG15044	160	piwi	843	0.74	0.82	0.72	0.878049
CG15456	95	piwi	843	0.74	0.82	0.72	0.878049
CG32271	248	piwi	843	0.74	0.67	0.75	1.1194
CG33159	257	piwi	843	0.74	0.66	0.75	1.13636
CG3795	305	piwi	843	0.74	0.78	0.73	0.935897
CG7878	703	piwi	843	0.74	0.72	0.74	1.02778
Jon74E	271	piwi	843	0.74	0.66	0.76	1.15152
CG12951	265	piwi	843	0.73	0.78	0.72	0.923077
CG13014	232	piwi	843	0.73	0.81	0.71	0.876543
CG30323	306	piwi	843	0.73	0.8	0.71	0.8875
CG33647	190	piwi	843	0.73	0.77	0.72	0.935065
CG7408	585	piwi	843	0.73	0.78	0.71	0.910256
Jon65Aiv	271	piwi	843	0.73	0.7	0.73	1.04286
Pdh	278	piwi	843	0.73	0.77	0.73	0.948052
Sfp26Ac	84	piwi	843	0.73	0.84	0.7	0.833333
CG31139	397	piwi	843	0.72	0.78	0.71	0.910256
CG33644	158	piwi	843	0.72	0.78	0.7	0.897436
Pka-C2	354	piwi	843	0.72	0.63	0.74	1.1746
CG7829	253	piwi	843	0.71	0.77	0.69	0.896104
CG8299	260	piwi	843	0.71	0.68	0.72	1.05882
fig	314	piwi	843	0.71	0.77	0.7	0.909091
Sac1	592	piwi	843	0.71	0.76	0.7	0.921053
CG32270	259	piwi	843	0.7	0.65	0.71	1.09231
CG3916	267	piwi	843	0.7	0.65	0.71	1.09231
CG5111	614	piwi	843	0.7	0.56	0.73	1.30357
CG7420	388	piwi	843	0.7	0.77	0.68	0.883117
CG13250	192	piwi	843	0.69	0.8	0.66	0.825
CG13840	466	piwi	843	0.69	0.62	0.7	1.12903
CG7724	398	piwi	843	0.69	0.66	0.69	1.04545
Gr77a	449	piwi	843	0.69	0.68	0.69	1.01471
Actn3	553	piwi	843	0.68	0.64	0.69	1.07812
CAH6	298	piwi	843	0.68	0.75	0.67	0.893333
cer	79	piwi	843	0.68	0.8	0.65	0.8125
CG18223	322	piwi	843	0.68	0.77	0.65	0.844156
CG31683	421	piwi	843	0.68	0.75	0.66	0.88
CheA56a	180	piwi	843	0.68	0.8	0.65	0.8125
vret	691	piwi	843	0.68	0.73	0.66	0.90411
APC10	195	piwi	843	0.67	0.79	0.64	0.810127
CG11192	279	piwi	843	0.67	0.65	0.67	1.03077
CG12133	340	piwi	843	0.67	0.64	0.68	1.0625
CG1227	320	piwi	843	0.67	0.75	0.65	0.866667
CG17931	60	piwi	843	0.67	0.83	0.62	0.746988
CG18661	222	piwi	843	0.67	0.77	0.65	0.844156
CG18662	146	piwi	843	0.67	0.82	0.63	0.768293
CG30487	198	piwi	843	0.67	0.74	0.65	0.878378
CG34189	122	piwi	843	0.67	0.81	0.64	0.790123
CG7737	543	piwi	843	0.67	0.74	0.66	0.891892
IFT46	416	piwi	843	0.67	0.63	0.68	1.07937
Jon44E	271	piwi	843	0.67	0.68	0.67	0.985294
Xrcc2	250	piwi	843	0.67	0.78	0.65	0.833333
CG11679	420	piwi	843	0.66	0.76	0.64	0.842105
CG12935	231	piwi	843	0.66	0.79	0.63	0.797468
CG13033	211	piwi	843	0.66	0.74	0.63	0.851351
CG17726	437	piwi	843	0.66	0.75	0.63	0.84
CG18858	421	piwi	843	0.66	0.75	0.64	0.853333
CG31832	227	piwi	843	0.66	0.77	0.64	0.831169
CG42259	92	piwi	843	0.66	0.81	0.62	0.765432
CG42727	211	piwi	843	0.66	0.77	0.63	0.818182
epsilonTry	256	piwi	843	0.66	0.66	0.67	1.01515
Gem2	245	piwi	843	0.66	0.79	0.62	0.78481
heix	359	piwi	843	0.66	0.75	0.63	0.84
Nup37	320	piwi	843	0.66	0.75	0.64	0.853333
ovm	194	piwi	843	0.66	0.72	0.65	0.902778
RNaseZ	766	piwi	843	0.66	0.72	0.65	0.902778
CG11912	271	piwi	843	0.65	0.66	0.65	0.984848
CG14569	195	piwi	843	0.65	0.74	0.63	0.851351
CG15111	411	piwi	843	0.65	0.75	0.63	0.84
CG30001	386	piwi	843	0.65	0.62	0.66	1.06452
CG30087	277	piwi	843	0.65	0.67	0.65	0.970149
CG32213	129	piwi	843	0.65	0.77	0.62	0.805195
CG33228	215	piwi	843	0.65	0.79	0.61	0.772152
CG9498	424	piwi	843	0.65	0.74	0.63	0.851351
fal	368	piwi	843	0.65	0.69	0.64	0.927536
Idgf2	440	piwi	843	0.65	0.75	0.62	0.826667
alphaTry	256	piwi	843	0.64	0.65	0.64	0.984615
Arl1	180	piwi	843	0.64	0.77	0.6	0.779221
CG13562	342	piwi	843	0.64	0.77	0.6	0.779221
CG14982	773	piwi	843	0.64	0.55	0.66	1.2
CG15577	99	piwi	843	0.64	0.8	0.6	0.75
CG17003	287	piwi	843	0.64	0.78	0.6	0.769231
CG30088	281	piwi	843	0.64	0.66	0.63	0.954545
CG32277	261	piwi	843	0.64	0.66	0.64	0.969697
CG3355	314	piwi	843	0.64	0.64	0.64	1
CG33643	178	piwi	843	0.64	0.79	0.6	0.759494
CG5885	190	piwi	843	0.64	0.79	0.6	0.759494
CG6356	570	piwi	843	0.64	0.71	0.62	0.873239
CG7542	270	piwi	843	0.64	0.64	0.63	0.984375
deltaTry	253	piwi	843	0.64	0.65	0.64	0.984615
Jon65Aiii	274	piwi	843	0.64	0.71	0.62	0.873239
Kap-alpha3	514	piwi	843	0.64	0.57	0.65	1.14035
mod	542	piwi	843	0.64	0.64	0.65	1.01562
Ser7	397	piwi	843	0.64	0.71	0.62	0.873239
twf	343	piwi	843	0.64	0.72	0.63	0.875
brn	325	piwi	843	0.63	0.76	0.59	0.776316
Cdlc2	89	piwi	843	0.63	0.78	0.59	0.75641
CG12084	793	piwi	843	0.63	0.71	0.61	0.859155
CG34174	217	piwi	843	0.63	0.74	0.6	0.810811
CG42566	77	piwi	843	0.63	0.81	0.59	0.728395
CG46388	192	piwi	843	0.63	0.76	0.59	0.776316
CG4927	362	piwi	843	0.63	0.61	0.63	1.03279
CG9304	637	piwi	843	0.63	0.63	0.64	1.01587
gammaTry	253	piwi	843	0.63	0.67	0.63	0.940299
GILT2	207	piwi	843	0.63	0.78	0.59	0.75641
Idgf5	444	piwi	843	0.63	0.74	0.6	0.810811
Ip259	259	piwi	843	0.63	0.74	0.6	0.810811
Jon99Cii	265	piwi	843	0.63	0.65	0.62	0.953846
Peritrophin-15a	92	piwi	843	0.63	0.81	0.58	0.716049
ppk29	425	piwi	843	0.63	0.75	0.6	0.8
tplus3a	441	piwi	843	0.63	0.66	0.62	0.939394
tsl	353	piwi	843	0.63	0.64	0.63	0.984375
Tsp42En	218	piwi	843	0.63	0.79	0.59	0.746835
wntD	309	piwi	843	0.63	0.76	0.6	0.789474
Amyrel	493	piwi	843	0.62	0.72	0.59	0.819444
CG11076	279	piwi	843	0.62	0.69	0.6	0.869565
CG15743	355	piwi	843	0.62	0.75	0.59	0.786667
CG32243	485	piwi	843	0.62	0.65	0.62	0.953846
CG5104	163	piwi	843	0.62	0.77	0.58	0.753247
CG5399	218	piwi	843	0.62	0.79	0.57	0.721519
Elba2	381	piwi	843	0.62	0.68	0.6	0.882353
lbm	208	piwi	843	0.62	0.78	0.58	0.74359
meru	524	piwi	843	0.62	0.66	0.61	0.924242
Sbp2	313	piwi	843	0.62	0.75	0.59	0.786667
SP555	301	piwi	843	0.62	0.66	0.62	0.939394
Svip	82	piwi	843	0.62	0.81	0.57	0.703704
CAH2	335	piwi	843	0.61	0.76	0.57	0.75
CG10469	267	piwi	843	0.61	0.66	0.59	0.893939
CG13324	112	piwi	843	0.61	0.81	0.56	0.691358
CG16995	146	piwi	843	0.61	0.76	0.57	0.75
CG30031	253	piwi	843	0.61	0.67	0.59	0.880597
CG40498	268	piwi	843	0.61	0.71	0.58	0.816901
Gclm	285	piwi	843	0.61	0.75	0.57	0.76
Jon99Ciii	265	piwi	843	0.61	0.65	0.59	0.907692
Kap-alpha1	543	piwi	843	0.61	0.57	0.62	1.08772
lambdaTry	272	piwi	843	0.61	0.66	0.6	0.909091
obst-H	269	piwi	843	0.61	0.7	0.58	0.828571
Orc5	460	piwi	843	0.61	0.72	0.59	0.819444
Rad60	424	piwi	843	0.61	0.63	0.61	0.968254
Sfp93F	53	piwi	843	0.61	0.81	0.56	0.691358
tplus3b	439	piwi	843	0.61	0.66	0.6	0.909091
Atx-1	230	piwi	843	0.6	0.76	0.56	0.736842
boil	450	piwi	843	0.6	0.71	0.57	0.802817
CG12519	131	piwi	843	0.6	0.75	0.56	0.746667
CG13002	212	piwi	843	0.6	0.78	0.55	0.705128
CG14088	289	piwi	843	0.6	0.73	0.57	0.780822
CG17974	259	piwi	843	0.6	0.68	0.58	0.852941
CG18088	663	piwi	843	0.6	0.7	0.57	0.814286
CG32365	628	piwi	843	0.6	0.56	0.61	1.08929
CG32845	386	piwi	843	0.6	0.69	0.58	0.84058
CG42870	94	piwi	843	0.6	0.79	0.56	0.708861
CG43110	483	piwi	843	0.6	0.68	0.58	0.852941
CG5339	305	piwi	843	0.6	0.75	0.57	0.76
dpr20	525	piwi	843	0.6	0.63	0.59	0.936508
eRF3	619	piwi	843	0.6	0.56	0.61	1.08929
msl-2	773	piwi	843	0.6	0.59	0.6	1.01695
Pdf	102	piwi	843	0.6	0.75	0.56	0.746667
PolZ2	198	piwi	843	0.6	0.75	0.56	0.746667
primo-2	164	piwi	843	0.6	0.78	0.55	0.705128
speck	275	piwi	843	0.6	0.76	0.56	0.736842
Trs23	219	piwi	843	0.6	0.77	0.56	0.727273
Brd8	872	piwi	843	0.59	0.53	0.6	1.13208
CG11251	338	piwi	843	0.59	0.73	0.56	0.767123
CG11836	333	piwi	843	0.59	0.62	0.59	0.951613
CG13063	129	piwi	843	0.59	0.76	0.55	0.723684
CG14154	249	piwi	843	0.59	0.74	0.55	0.743243
CG30025	253	piwi	843	0.59	0.67	0.58	0.865672
CG42709	458	piwi	843	0.59	0.68	0.57	0.838235
CG43179	152	piwi	843	0.59	0.78	0.54	0.692308
CG4914	374	piwi	843	0.59	0.63	0.58	0.920635
CG5335	321	piwi	843	0.59	0.73	0.55	0.753425
CG6503	62	piwi	843	0.59	0.81	0.53	0.654321
CG9300	673	piwi	843	0.59	0.69	0.56	0.811594
CheA75a	184	piwi	843	0.59	0.77	0.54	0.701299
Datp	142	piwi	843	0.59	0.77	0.55	0.714286
Dok	622	piwi	843	0.59	0.61	0.58	0.95082
Dro	64	piwi	843	0.59	0.8	0.54	0.675
eIF1	110	piwi	843	0.59	0.79	0.54	0.683544
FarO	504	piwi	843	0.59	0.69	0.56	0.811594
fok	129	piwi	843	0.59	0.76	0.54	0.710526
Jon99Fi	267	piwi	843	0.59	0.74	0.56	0.756757
ND-B16.6	154	piwi	843	0.59	0.76	0.55	0.723684
Nepl6	655	piwi	843	0.59	0.54	0.61	1.12963
Npc2f	170	piwi	843	0.59	0.79	0.54	0.683544
PIG-H	221	piwi	843	0.59	0.79	0.55	0.696203
png	291	piwi	843	0.59	0.73	0.55	0.753425
Sas10	428	piwi	843	0.59	0.63	0.58	0.920635
Slbp	276	piwi	843	0.59	0.69	0.57	0.826087
Sr-CIV	406	piwi	843	0.59	0.72	0.56	0.777778
vls	367	piwi	843	0.59	0.72	0.56	0.777778
WASp	527	piwi	843	0.59	0.58	0.59	1.01724
CARPA	333	piwi	843	0.58	0.7	0.55	0.785714
CG10931	345	piwi	843	0.58	0.62	0.57	0.919355
CG14182	168	piwi	843	0.58	0.78	0.53	0.679487
CG15445	618	piwi	843	0.58	0.57	0.58	1.01754
CG15446	373	piwi	843	0.58	0.66	0.56	0.848485
CG31269	273	piwi	843	0.58	0.7	0.56	0.8
CG34056	341	piwi	843	0.58	0.72	0.55	0.763889
CG4477	315	piwi	843	0.58	0.74	0.54	0.72973
CG7326	482	piwi	843	0.58	0.7	0.55	0.785714
CG7550	240	piwi	843	0.58	0.67	0.56	0.835821
CG8586	444	piwi	843	0.58	0.72	0.54	0.75
eIF4E4	229	piwi	843	0.58	0.77	0.53	0.688312
fan	218	piwi	843	0.58	0.77	0.53	0.688312
jagn	197	piwi	843	0.58	0.77	0.53	0.688312
mRpL27	138	piwi	843	0.58	0.78	0.52	0.666667
Pen	522	piwi	843	0.58	0.55	0.59	1.07273
tsu	165	piwi	843	0.58	0.76	0.54	0.710526
betaTry	253	piwi	843	0.57	0.66	0.55	0.833333
CG16710	372	piwi	843	0.57	0.62	0.56	0.903226
CG2147	165	piwi	843	0.57	0.74	0.53	0.716216
CG31546	264	piwi	843	0.57	0.66	0.55	0.833333
CG31659	192	piwi	843	0.57	0.71	0.53	0.746479
CG32214	116	piwi	843	0.57	0.78	0.52	0.666667
CG32591	392	piwi	843	0.57	0.64	0.55	0.859375
CG42558	122	piwi	843	0.57	0.77	0.52	0.675325
CG4270	170	piwi	843	0.57	0.69	0.53	0.768116
CG42749	345	piwi	843	0.57	0.72	0.53	0.736111
CG5367	338	piwi	843	0.57	0.74	0.52	0.702703
CG5466	594	piwi	843	0.57	0.61	0.55	0.901639
CG8042	656	piwi	843	0.57	0.56	0.57	1.01786
CG9592	152	piwi	843	0.57	0.78	0.52	0.666667
Cyp6u1	488	piwi	843	0.57	0.7	0.53	0.757143
Lsm11	256	piwi	843	0.57	0.72	0.53	0.736111
Mocs2A	90	piwi	843	0.57	0.79	0.51	0.64557
Polr1C	333	piwi	843	0.57	0.7	0.54	0.771429
rdo	757	piwi	843	0.57	0.66	0.54	0.818182
Set1	1641	piwi	843	0.57	0.42	0.6	1.42857
SPE	400	piwi	843	0.57	0.6	0.56	0.933333
Ars2	943	piwi	843	0.56	0.5	0.58	1.16
CG10713	475	piwi	843	0.56	0.6	0.54	0.9
CG14515	168	piwi	843	0.56	0.72	0.52	0.722222
CG14567	190	piwi	843	0.56	0.74	0.52	0.702703
CG15877	277	piwi	843	0.56	0.74	0.52	0.702703
CG16799	179	piwi	843	0.56	0.76	0.51	0.671053
CG17572	385	piwi	843	0.56	0.62	0.55	0.887097
CG17985	271	piwi	843	0.56	0.71	0.52	0.732394
CG30110	614	piwi	843	0.56	0.58	0.55	0.948276
CG32269	332	piwi	843	0.56	0.62	0.54	0.870968
CG33128	405	piwi	843	0.56	0.73	0.51	0.69863
CG33469	160	piwi	843	0.56	0.77	0.51	0.662338
CG34163	87	piwi	843	0.56	0.79	0.5	0.632911
CG43776	270	piwi	843	0.56	0.67	0.53	0.791045
CG4593	209	piwi	843	0.56	0.73	0.52	0.712329
CG6865	285	piwi	843	0.56	0.67	0.53	0.791045
CG9586	218	piwi	843	0.56	0.71	0.52	0.732394
Cp1	371	piwi	843	0.56	0.71	0.52	0.732394
feo	671	piwi	843	0.56	0.63	0.55	0.873016
Gr59b	366	piwi	843	0.56	0.65	0.53	0.815385
Jon66Ci	260	piwi	843	0.56	0.66	0.54	0.818182
TotC	129	piwi	843	0.56	0.76	0.51	0.671053
Unc-76	474	piwi	843	0.56	0.59	0.56	0.949153
alpha-Est1	565	piwi	843	0.55	0.6	0.54	0.9
CAH5	302	piwi	843	0.55	0.72	0.51	0.708333
CG10472	290	piwi	843	0.55	0.65	0.53	0.815385
CG12716	418	piwi	843	0.55	0.63	0.53	0.84127
CG1773	317	piwi	843	0.55	0.69	0.51	0.73913
CG18294	141	piwi	843	0.55	0.75	0.5	0.666667
CG1971	263	piwi	843	0.55	0.68	0.51	0.75
CG30002	311	piwi	843	0.55	0.68	0.51	0.75
CG33702	179	piwi	843	0.55	0.74	0.51	0.689189
CG34033	168	piwi	843	0.55	0.77	0.49	0.636364
CG34323	112	piwi	843	0.55	0.81	0.49	0.604938
CG4053	265	piwi	843	0.55	0.71	0.51	0.71831
CG42780	254	piwi	843	0.55	0.73	0.51	0.69863
CG4287	333	piwi	843	0.55	0.7	0.51	0.728571
CG45546	93	piwi	843	0.55	0.78	0.49	0.628205
CG46192	133	piwi	843	0.55	0.77	0.49	0.636364
CG7276	171	piwi	843	0.55	0.77	0.49	0.636364
CG8004	269	piwi	843	0.55	0.76	0.5	0.657895
CG8097	446	piwi	843	0.55	0.72	0.51	0.708333
CG8401	314	piwi	843	0.55	0.67	0.52	0.776119
CG9294	352	piwi	843	0.55	0.73	0.5	0.684932
CG9641	535	piwi	843	0.55	0.59	0.54	0.915254
Gpb5	169	piwi	843	0.55	0.75	0.5	0.666667
Irc	697	piwi	843	0.55	0.68	0.51	0.75
Jon99Ci	272	piwi	843	0.55	0.68	0.52	0.764706
mRpL10	248	piwi	843	0.55	0.73	0.5	0.684932
mRpS16	129	piwi	843	0.55	0.76	0.5	0.657895
Nufip	511	piwi	843	0.55	0.6	0.53	0.883333
Or74a	404	piwi	843	0.55	0.72	0.51	0.708333
park	482	piwi	843	0.55	0.72	0.51	0.708333
PSMG1	235	piwi	843	0.55	0.75	0.5	0.666667
Pu	324	piwi	843	0.55	0.64	0.53	0.828125
RpS20	120	piwi	843	0.55	0.78	0.49	0.628205
sas	1693	piwi	843	0.55	0.43	0.58	1.34884
Teh2	313	piwi	843	0.55	0.73	0.51	0.69863
tomb	243	piwi	843	0.55	0.72	0.51	0.708333
Tsp33B	326	piwi	843	0.55	0.73	0.5	0.684932
Vps11	830	piwi	843	0.55	0.6	0.54	0.9
Acyp	120	piwi	843	0.54	0.77	0.48	0.623377
cas	793	piwi	843	0.54	0.56	0.53	0.946429
CG11141	710	piwi	843	0.54	0.65	0.51	0.784615
CG14096	122	piwi	843	0.54	0.77	0.49	0.636364
CG14104	68	piwi	843	0.54	0.8	0.47	0.5875
CG14657	444	piwi	843	0.54	0.62	0.52	0.83871
CG18266	486	piwi	843	0.54	0.62	0.52	0.83871
CG33056	343	piwi	843	0.54	0.71	0.5	0.704225
CG33645	189	piwi	843	0.54	0.76	0.48	0.631579
CG3376	764	piwi	843	0.54	0.66	0.51	0.772727
CG34261	148	piwi	843	0.54	0.74	0.49	0.662162
CG34404	715	piwi	843	0.54	0.54	0.53	0.981481
CG34436	270	piwi	843	0.54	0.7	0.5	0.714286
CG44195	694	piwi	843	0.54	0.55	0.54	0.981818
CG4613	374	piwi	843	0.54	0.61	0.53	0.868852
CG4975	418	piwi	843	0.54	0.61	0.53	0.868852
CG5255	273	piwi	843	0.54	0.73	0.49	0.671233
CG5597	260	piwi	843	0.54	0.75	0.49	0.653333
CG6903	576	piwi	843	0.54	0.69	0.5	0.724638
CG7655	253	piwi	843	0.54	0.75	0.49	0.653333
CG7945	262	piwi	843	0.54	0.7	0.5	0.714286
Cks30A	74	piwi	843	0.54	0.78	0.47	0.602564
Doc3	424	piwi	843	0.54	0.68	0.5	0.735294
fu	805	piwi	843	0.54	0.59	0.53	0.898305
Hr83	278	piwi	843	0.54	0.72	0.49	0.680556
Imp	638	piwi	843	0.54	0.55	0.53	0.963636
qtc	721	piwi	843	0.54	0.54	0.54	1
RpL18A	177	piwi	843	0.54	0.78	0.49	0.628205
Sp7	391	piwi	843	0.54	0.62	0.52	0.83871
TotB	138	piwi	843	0.54	0.75	0.48	0.64
tpr	372	piwi	843	0.54	0.61	0.52	0.852459
Ugt36D1	519	piwi	843	0.54	0.69	0.5	0.724638
Vap33	269	piwi	843	0.54	0.73	0.49	0.671233
Ankrd49	215	piwi	843	0.53	0.73	0.48	0.657534
APC7	615	piwi	843	0.53	0.67	0.5	0.746269
Argp	164	piwi	843	0.53	0.75	0.48	0.64
brwl	435	piwi	843	0.53	0.67	0.49	0.731343
CG11444	215	piwi	843	0.53	0.71	0.48	0.676056
CG14297	250	piwi	843	0.53	0.74	0.48	0.648649
CG1602	577	piwi	843	0.53	0.61	0.51	0.836066
CG16825	281	piwi	843	0.53	0.73	0.48	0.657534
CG30090	291	piwi	843	0.53	0.64	0.5	0.78125
CG31948	372	piwi	843	0.53	0.71	0.48	0.676056
CG32374	299	piwi	843	0.53	0.64	0.51	0.796875
CG32376	291	piwi	843	0.53	0.64	0.51	0.796875
CG32554	239	piwi	843	0.53	0.7	0.49	0.7
CG32668	863	piwi	843	0.53	0.51	0.53	1.03922
CG32816	378	piwi	843	0.53	0.66	0.49	0.742424
CG33985	277	piwi	843	0.53	0.7	0.49	0.7
CG3995	322	piwi	843	0.53	0.72	0.48	0.666667
CG44250	297	piwi	843	0.53	0.73	0.48	0.657534
CG6276	470	piwi	843	0.53	0.61	0.51	0.836066
CG6614	1058	piwi	843	0.53	0.61	0.5	0.819672
CG7179	696	piwi	843	0.53	0.58	0.52	0.896552
CG7295	305	piwi	843	0.53	0.68	0.49	0.720588
CG7685	213	piwi	843	0.53	0.76	0.48	0.631579
CkIIalpha-i1	410	piwi	843	0.53	0.66	0.49	0.742424
Eig71Ea	100	piwi	843	0.53	0.79	0.46	0.582278
ppk6	498	piwi	843	0.53	0.68	0.5	0.735294
robl37BC	115	piwi	843	0.53	0.79	0.47	0.594937
SerRS-m	417	piwi	843	0.53	0.7	0.49	0.7
SmydA-7	488	piwi	843	0.53	0.62	0.51	0.822581
Tsp42Ee	228	piwi	843	0.53	0.74	0.48	0.648649
beat-Vc	297	piwi	843	0.52	0.72	0.47	0.652778
CG11279	102	piwi	843	0.52	0.78	0.45	0.576923
CG12728	477	piwi	843	0.52	0.64	0.49	0.765625
CG12729	233	piwi	843	0.52	0.77	0.46	0.597403
CG13062	118	piwi	843	0.52	0.76	0.46	0.605263
CG13398	442	piwi	843	0.52	0.66	0.48	0.727273
CG14013	241	piwi	843	0.52	0.77	0.46	0.597403
CG14194	358	piwi	843	0.52	0.72	0.47	0.652778
CG14645	97	piwi	843	0.52	0.8	0.45	0.5625
CG17242	245	piwi	843	0.52	0.74	0.46	0.621622
CG17321	373	piwi	843	0.52	0.67	0.48	0.716418
CG2854	491	piwi	843	0.52	0.7	0.47	0.671429
CG31751	417	piwi	843	0.52	0.7	0.47	0.671429
CG32452	574	piwi	843	0.52	0.59	0.51	0.864407
CG33108	267	piwi	843	0.52	0.73	0.47	0.643836
CG33489	497	piwi	843	0.52	0.64	0.49	0.765625
CG34038	271	piwi	843	0.52	0.68	0.48	0.705882
CG45770	214	piwi	843	0.52	0.7	0.47	0.671429
CG5895	453	piwi	843	0.52	0.66	0.49	0.742424
CG8563	440	piwi	843	0.52	0.69	0.48	0.695652
CG9372	408	piwi	843	0.52	0.6	0.5	0.833333
CG9863	267	piwi	843	0.52	0.7	0.47	0.671429
CheB74a	202	piwi	843	0.52	0.76	0.46	0.605263
chico	968	piwi	843	0.52	0.55	0.52	0.945455
fs2ltoPP43	367	piwi	843	0.52	0.66	0.49	0.742424
IM33	82	piwi	843	0.52	0.77	0.46	0.597403
Lhr	334	piwi	843	0.52	0.7	0.48	0.685714
Lime	487	piwi	843	0.52	0.61	0.49	0.803279
Or82a	385	piwi	843	0.52	0.69	0.48	0.695652
Pfdn2	143	piwi	843	0.52	0.77	0.46	0.597403
Ppt2	288	piwi	843	0.52	0.72	0.47	0.652778
RacGAP84C	384	piwi	843	0.52	0.7	0.47	0.671429
RpL23	140	piwi	843	0.52	0.77	0.46	0.597403
RpS28b	65	piwi	843	0.52	0.79	0.45	0.56962
RpS30	132	piwi	843	0.52	0.78	0.46	0.589744
Sws1	179	piwi	843	0.52	0.76	0.46	0.605263
thetaTry	262	piwi	843	0.52	0.67	0.48	0.716418
Try29F	267	piwi	843	0.52	0.65	0.48	0.738462
Ykt6	199	piwi	843	0.52	0.73	0.47	0.643836
825-Oak	129	piwi	843	0.51	0.74	0.45	0.608108
CG11674	344	piwi	843	0.51	0.72	0.46	0.638889
CG13186	143	piwi	843	0.51	0.77	0.44	0.571429
CG13640	132	piwi	843	0.51	0.73	0.45	0.616438
CG16756	152	piwi	843	0.51	0.76	0.45	0.592105
CG16998	258	piwi	843	0.51	0.65	0.48	0.738462
CG18735	364	piwi	843	0.51	0.61	0.49	0.803279
CG31371	507	piwi	843	0.51	0.68	0.47	0.691176
CG31690	859	piwi	843	0.51	0.57	0.49	0.859649
CG31954	277	piwi	843	0.51	0.69	0.47	0.681159
CG32425	759	piwi	843	0.51	0.59	0.49	0.830508
CG34185	126	piwi	843	0.51	0.73	0.45	0.616438
CG34312	156	piwi	843	0.51	0.75	0.45	0.6
CG3829	597	piwi	843	0.51	0.67	0.47	0.701493
CG42504	220	piwi	843	0.51	0.7	0.46	0.657143
CG42867	67	piwi	843	0.51	0.78	0.44	0.564103
CG7115	524	piwi	843	0.51	0.68	0.47	0.691176
CG9737	424	piwi	843	0.51	0.61	0.48	0.786885
CG9992	322	piwi	843	0.51	0.67	0.47	0.701493
crok	151	piwi	843	0.51	0.77	0.45	0.584416
Drsl5	69	piwi	843	0.51	0.8	0.44	0.55
Kua	310	piwi	843	0.51	0.66	0.47	0.712121
Lk	160	piwi	843	0.51	0.73	0.46	0.630137
mino	850	piwi	843	0.51	0.54	0.5	0.925926
Npc2e	168	piwi	843	0.51	0.76	0.45	0.592105
Phf5a	111	piwi	843	0.51	0.77	0.45	0.584416
Pop4	206	piwi	843	0.51	0.69	0.46	0.666667
Pten	514	piwi	843	0.51	0.57	0.5	0.877193
Rab18	197	piwi	843	0.51	0.75	0.45	0.6
RpS24	131	piwi	843	0.51	0.8	0.43	0.5375
RpS28-like	76	piwi	843	0.51	0.81	0.43	0.530864
T48	419	piwi	843	0.51	0.64	0.48	0.75
TRAM	368	piwi	843	0.51	0.66	0.48	0.727273
Tsp42El	217	piwi	843	0.51	0.73	0.46	0.630137
Acp53Ea	120	piwi	843	0.5	0.78	0.43	0.551282
beta4GalNAcTB	323	piwi	843	0.5	0.71	0.45	0.633803
Bsg	648	piwi	843	0.5	0.56	0.48	0.857143
Btnd	553	piwi	843	0.5	0.64	0.46	0.71875
CG10208	276	piwi	843	0.5	0.71	0.45	0.633803
CG12194	496	piwi	843	0.5	0.67	0.46	0.686567
CG13474	148	piwi	843	0.5	0.75	0.44	0.586667
CG1503	307	piwi	843	0.5	0.73	0.45	0.616438
CG16749	265	piwi	843	0.5	0.72	0.45	0.625
CG2186	1193	piwi	843	0.5	0.47	0.51	1.08511
CG31131	379	piwi	843	0.5	0.62	0.47	0.758065
CG31265	266	piwi	843	0.5	0.67	0.46	0.686567
CG31609	123	piwi	843	0.5	0.77	0.43	0.558442
CG31869	777	piwi	843	0.5	0.53	0.49	0.924528
CG33468	172	piwi	843	0.5	0.76	0.43	0.565789
CG34043	338	piwi	843	0.5	0.71	0.45	0.633803
CG3650	249	piwi	843	0.5	0.67	0.45	0.671642
CG4017	424	piwi	843	0.5	0.7	0.45	0.642857
CG43057	123	piwi	843	0.5	0.76	0.44	0.578947
CG4982	113	piwi	843	0.5	0.79	0.43	0.544304
CG5062	581	piwi	843	0.5	0.59	0.47	0.79661
CG5493	238	piwi	843	0.5	0.74	0.44	0.594595
CG9316	448	piwi	843	0.5	0.63	0.47	0.746032
CG9336	148	piwi	843	0.5	0.77	0.44	0.571429
Cht12	470	piwi	843	0.5	0.65	0.46	0.707692
Cp36	284	piwi	843	0.5	0.67	0.46	0.686567
CtIP	493	piwi	843	0.5	0.61	0.47	0.770492
ebd1	581	piwi	843	0.5	0.57	0.48	0.842105
Gr21a	447	piwi	843	0.5	0.61	0.47	0.770492
Gr47b	414	piwi	843	0.5	0.69	0.45	0.652174
hdly	445	piwi	843	0.5	0.65	0.46	0.707692
Mur18B	481	piwi	843	0.5	0.64	0.47	0.734375
p53	495	piwi	843	0.5	0.67	0.46	0.686567
PGRP-SD	186	piwi	843	0.5	0.74	0.45	0.608108
Reg-5	288	piwi	843	0.5	0.7	0.44	0.628571
rumi	411	piwi	843	0.5	0.67	0.46	0.686567
scaf	655	piwi	843	0.5	0.6	0.48	0.8
Srp72	650	piwi	843	0.5	0.54	0.49	0.907407
usp	508	piwi	843	0.5	0.67	0.46	0.686567
Vps25	174	piwi	843	0.5	0.77	0.43	0.558442
Wbp2	384	piwi	843	0.5	0.71	0.44	0.619718
alphaSnap	292	piwi	843	0.49	0.72	0.43	0.597222
ap	469	piwi	843	0.49	0.62	0.46	0.741935
Arl8	186	piwi	843	0.49	0.74	0.43	0.581081
beat-IIIc	383	piwi	843	0.49	0.68	0.44	0.647059
BI-1	245	piwi	843	0.49	0.73	0.43	0.589041
CG10650	425	piwi	843	0.49	0.65	0.44	0.676923
CG12065	706	piwi	843	0.49	0.64	0.46	0.71875
CG12213	581	piwi	843	0.49	0.59	0.46	0.779661
CG13018	79	piwi	843	0.49	0.8	0.42	0.525
CG13056	99	piwi	843	0.49	0.78	0.41	0.525641
CG13538	190	piwi	843	0.49	0.75	0.43	0.573333
CG13744	389	piwi	843	0.49	0.7	0.43	0.614286
CG14232	480	piwi	843	0.49	0.61	0.45	0.737705
CG15674	445	piwi	843	0.49	0.62	0.45	0.725806
CG17549	287	piwi	843	0.49	0.66	0.45	0.681818
CG18480	550	piwi	843	0.49	0.63	0.46	0.730159
CG30197	113	piwi	843	0.49	0.79	0.42	0.531646
CG31189	258	piwi	843	0.49	0.69	0.44	0.637681
CG31446	237	piwi	843	0.49	0.72	0.43	0.597222
CG31821	427	piwi	843	0.49	0.59	0.46	0.779661
CG32437	650	piwi	843	0.49	0.63	0.46	0.730159
CG42296	994	piwi	843	0.49	0.51	0.48	0.941176
CG42446	123	piwi	843	0.49	0.76	0.42	0.552632
CG42525	419	piwi	843	0.49	0.64	0.46	0.71875
CG43246	168	piwi	843	0.49	0.75	0.42	0.56
CG4884	189	piwi	843	0.49	0.73	0.43	0.589041
CG5934	135	piwi	843	0.49	0.75	0.43	0.573333
CG7239	459	piwi	843	0.49	0.63	0.46	0.730159
CG7366	389	piwi	843	0.49	0.62	0.46	0.741935
CG7849	317	piwi	843	0.49	0.73	0.43	0.589041
CG9101	198	piwi	843	0.49	0.72	0.43	0.597222
Hex-t1	465	piwi	843	0.49	0.68	0.44	0.647059
Hyls1	242	piwi	843	0.49	0.71	0.43	0.605634
ktub	469	piwi	843	0.49	0.68	0.45	0.661765
lbe	479	piwi	843	0.49	0.6	0.46	0.766667
MESK4	280	piwi	843	0.49	0.67	0.44	0.656716
mia	589	piwi	843	0.49	0.59	0.46	0.779661
Mst33A	359	piwi	843	0.49	0.66	0.45	0.681818
Obp56f	125	piwi	843	0.49	0.77	0.43	0.558442
Pa1	122	piwi	843	0.49	0.75	0.42	0.56
pasha	642	piwi	843	0.49	0.55	0.47	0.854545
PGRP-SC1a	185	piwi	843	0.49	0.75	0.42	0.56
RpL36A	104	piwi	843	0.49	0.78	0.42	0.538462
scpr-C	262	piwi	843	0.49	0.67	0.44	0.656716
sinu	247	piwi	843	0.49	0.73	0.42	0.575342
Tsp42Er	211	piwi	843	0.49	0.72	0.44	0.611111
Xpac	296	piwi	843	0.49	0.71	0.43	0.605634
Ama	341	piwi	843	0.48	0.7	0.43	0.614286
angel	354	piwi	843	0.48	0.67	0.43	0.641791
ato	312	piwi	843	0.48	0.65	0.43	0.661538
bam	442	piwi	843	0.48	0.66	0.44	0.666667
CG11345	242	piwi	843	0.48	0.71	0.42	0.591549
CG12155	555	piwi	843	0.48	0.59	0.45	0.762712
CG12278	229	piwi	843	0.48	0.7	0.43	0.614286
CG14011	388	piwi	843	0.48	0.65	0.43	0.661538
CG14125	263	piwi	843	0.48	0.71	0.43	0.605634
CG14223	581	piwi	843	0.48	0.56	0.46	0.821429
CG17118	281	piwi	843	0.48	0.74	0.42	0.567568
CG17472	159	piwi	843	0.48	0.72	0.42	0.583333
CG32112	510	piwi	843	0.48	0.67	0.44	0.656716
CG32450	158	piwi	843	0.48	0.74	0.42	0.567568
CG33181	696	piwi	843	0.48	0.55	0.46	0.836364
CG3347	538	piwi	843	0.48	0.58	0.45	0.775862
CG34171	292	piwi	843	0.48	0.69	0.42	0.608696
CG34260	178	piwi	843	0.48	0.75	0.41	0.546667
CG3788	378	piwi	843	0.48	0.61	0.44	0.721311
CG4363	199	piwi	843	0.48	0.76	0.41	0.539474
CG5390	406	piwi	843	0.48	0.7	0.42	0.6
CG5445	303	piwi	843	0.48	0.66	0.43	0.651515
CG5928	199	piwi	843	0.48	0.72	0.42	0.583333
CG7335	372	piwi	843	0.48	0.69	0.43	0.623188
CG7650	276	piwi	843	0.48	0.68	0.44	0.647059
CG9427	213	piwi	843	0.48	0.73	0.42	0.575342
cup	1117	piwi	843	0.48	0.49	0.48	0.979592
dbf	652	piwi	843	0.48	0.59	0.45	0.762712
eIF2Balpha	306	piwi	843	0.48	0.69	0.43	0.623188
Fign	523	piwi	843	0.48	0.57	0.46	0.807018
I-t	184	piwi	843	0.48	0.74	0.41	0.554054
Lst	152	piwi	843	0.48	0.73	0.42	0.575342
NaPi-III	667	piwi	843	0.48	0.6	0.44	0.733333
Nbr	625	piwi	843	0.48	0.55	0.46	0.836364
tank	497	piwi	843	0.48	0.58	0.46	0.793103
TyrRII	586	piwi	843	0.48	0.62	0.45	0.725806
UQCR-14	111	piwi	843	0.48	0.79	0.4	0.506329
CG10973	306	piwi	843	0.47	0.68	0.41	0.602941
CG11263	265	piwi	843	0.47	0.73	0.41	0.561644
CG1142	281	piwi	843	0.47	0.71	0.4	0.56338
CG12680	215	piwi	843	0.47	0.75	0.4	0.533333
CG13663	177	piwi	843	0.47	0.74	0.41	0.554054
CG13796	641	piwi	843	0.47	0.63	0.43	0.68254
CG13931	172	piwi	843	0.47	0.71	0.41	0.577465
CG14628	141	piwi	843	0.47	0.78	0.39	0.5
CG14930	248	piwi	843	0.47	0.7	0.42	0.6
CG15019	146	piwi	843	0.47	0.77	0.4	0.519481
CG15021	420	piwi	843	0.47	0.62	0.44	0.709677
CG15073	580	piwi	843	0.47	0.59	0.44	0.745763
CG15317	193	piwi	843	0.47	0.7	0.41	0.585714
CG15602	342	piwi	843	0.47	0.64	0.42	0.65625
CG15767	370	piwi	843	0.47	0.67	0.43	0.641791
CG17477	267	piwi	843	0.47	0.69	0.41	0.594203
CG17801	381	piwi	843	0.47	0.62	0.43	0.693548
CG2611	132	piwi	843	0.47	0.78	0.39	0.5
CG30083	279	piwi	843	0.47	0.71	0.41	0.577465
CG31176	460	piwi	843	0.47	0.6	0.44	0.733333
CG32036	173	piwi	843	0.47	0.72	0.41	0.569444
CG4025	246	piwi	843	0.47	0.72	0.41	0.569444
CG45765	214	piwi	843	0.47	0.71	0.41	0.577465
CG46191	102	piwi	843	0.47	0.79	0.39	0.493671
CG5162	411	piwi	843	0.47	0.59	0.44	0.745763
CG6398	290	piwi	843	0.47	0.65	0.43	0.661538
CG6553	319	piwi	843	0.47	0.68	0.42	0.617647
CG8539	385	piwi	843	0.47	0.64	0.43	0.671875
CG8785	474	piwi	843	0.47	0.59	0.44	0.745763
CG9733	418	piwi	843	0.47	0.59	0.44	0.745763
Cyp4p2	520	piwi	843	0.47	0.62	0.43	0.693548
dos	878	piwi	843	0.47	0.51	0.46	0.901961
dpr21	282	piwi	843	0.47	0.69	0.42	0.608696
Drsl1	69	piwi	843	0.47	0.79	0.38	0.481013
Drsl3	71	piwi	843	0.47	0.8	0.38	0.475
egr	415	piwi	843	0.47	0.65	0.43	0.661538
Fadd	239	piwi	843	0.47	0.72	0.4	0.555556
Ids	512	piwi	843	0.47	0.66	0.42	0.636364
Parp16	359	piwi	843	0.47	0.71	0.41	0.577465
PIG-Wb	504	piwi	843	0.47	0.59	0.43	0.728814
Rab5	219	piwi	843	0.47	0.69	0.41	0.594203
reb	431	piwi	843	0.47	0.69	0.41	0.594203
Samtor	302	piwi	843	0.47	0.74	0.41	0.554054
srl	1067	piwi	843	0.47	0.49	0.47	0.959184
Tim10	92	piwi	843	0.47	0.77	0.39	0.506494
Tmx3	430	piwi	843	0.47	0.59	0.44	0.745763
vlc	605	piwi	843	0.47	0.57	0.45	0.789474
zetaCOP	174	piwi	843	0.47	0.73	0.4	0.547945
bard	448	piwi	843	0.46	0.64	0.41	0.640625
CG11134	227	piwi	843	0.46	0.7	0.39	0.557143
CG12104	250	piwi	843	0.46	0.69	0.41	0.594203
CG12206	582	piwi	843	0.46	0.56	0.43	0.767857
CG12576	369	piwi	843	0.46	0.64	0.42	0.65625
CG12851	1081	piwi	843	0.46	0.48	0.46	0.958333
CG13309	229	piwi	843	0.46	0.73	0.39	0.534247
CG14135	259	piwi	843	0.46	0.7	0.4	0.571429
CG14245	103	piwi	843	0.46	0.79	0.38	0.481013
CG14561	194	piwi	843	0.46	0.7	0.4	0.571429
CG14866	455	piwi	843	0.46	0.61	0.42	0.688525
CG14879	179	piwi	843	0.46	0.75	0.38	0.506667
CG1529	512	piwi	843	0.46	0.59	0.43	0.728814
CG15443	358	piwi	843	0.46	0.63	0.41	0.650794
CG15533	692	piwi	843	0.46	0.53	0.44	0.830189
CG16753	177	piwi	843	0.46	0.75	0.38	0.506667
CG30350	369	piwi	843	0.46	0.7	0.4	0.571429
CG30375	398	piwi	843	0.46	0.65	0.41	0.630769
CG30467	521	piwi	843	0.46	0.58	0.43	0.741379
CG3184	356	piwi	843	0.46	0.61	0.42	0.688525
CG31922	139	piwi	843	0.46	0.75	0.39	0.52
CG32260	575	piwi	843	0.46	0.63	0.42	0.666667
CG32379	344	piwi	843	0.46	0.68	0.41	0.602941
CG32813	699	piwi	843	0.46	0.54	0.44	0.814815
CG33626	167	piwi	843	0.46	0.74	0.39	0.527027
CG34291	61	piwi	843	0.46	0.79	0.38	0.481013
CG3651	770	piwi	843	0.46	0.53	0.44	0.830189
CG4186	85	piwi	843	0.46	0.8	0.37	0.4625
CG42355	161	piwi	843	0.46	0.75	0.38	0.506667
CG42356	422	piwi	843	0.46	0.66	0.4	0.606061
CG4627	204	piwi	843	0.46	0.75	0.38	0.506667
CG7168	233	piwi	843	0.46	0.71	0.39	0.549296
CG7715	218	piwi	843	0.46	0.73	0.39	0.534247
CG9240	166	piwi	843	0.46	0.72	0.4	0.555556
CG9853	339	piwi	843	0.46	0.69	0.41	0.594203
Ciz1	919	piwi	843	0.46	0.5	0.45	0.9
Dic61B	764	piwi	843	0.46	0.61	0.42	0.688525
Drsl4	71	piwi	843	0.46	0.79	0.38	0.481013
Flo1	430	piwi	843	0.46	0.63	0.41	0.650794
glu	1409	piwi	843	0.46	0.47	0.46	0.978723
Gr9a	341	piwi	843	0.46	0.69	0.4	0.57971
inaF-D	353	piwi	843	0.46	0.65	0.41	0.630769
Jheh3	468	piwi	843	0.46	0.64	0.41	0.640625
Jon66Cii	262	piwi	843	0.46	0.68	0.41	0.602941
mst	574	piwi	843	0.46	0.56	0.43	0.767857
Naam	357	piwi	843	0.46	0.67	0.4	0.597015
Nepl18	682	piwi	843	0.46	0.54	0.44	0.814815
NtR	585	piwi	843	0.46	0.6	0.43	0.716667
papi	576	piwi	843	0.46	0.55	0.44	0.8
Pngl	631	piwi	843	0.46	0.62	0.42	0.677419
Ppox	475	piwi	843	0.46	0.66	0.41	0.621212
regucalcin	319	piwi	843	0.46	0.69	0.4	0.57971
rtv	151	piwi	843	0.46	0.76	0.39	0.513158
SmydA-6	498	piwi	843	0.46	0.56	0.44	0.785714
Tango14	278	piwi	843	0.46	0.72	0.4	0.555556
Tsp42Ei	229	piwi	843	0.46	0.72	0.39	0.541667
Tsp42Ep	250	piwi	843	0.46	0.7	0.4	0.571429
Ypel	114	piwi	843	0.46	0.76	0.39	0.513158
bcn92	92	piwi	843	0.45	0.8	0.36	0.45
BomT2	76	piwi	843	0.45	0.78	0.37	0.474359
btz	806	piwi	843	0.45	0.52	0.44	0.846154
CAH13	527	piwi	843	0.45	0.64	0.4	0.625
CG11865	240	piwi	843	0.45	0.72	0.38	0.527778
CG13996	256	piwi	843	0.45	0.72	0.39	0.541667
CG14341	180	piwi	843	0.45	0.72	0.39	0.541667
CG14483	82	piwi	843	0.45	0.81	0.36	0.444444
CG15253	253	piwi	843	0.45	0.69	0.39	0.565217
CG15543	290	piwi	843	0.45	0.72	0.38	0.527778
CG17270	169	piwi	843	0.45	0.72	0.38	0.527778
CG17271	281	piwi	843	0.45	0.67	0.4	0.597015
CG18178	374	piwi	843	0.45	0.67	0.4	0.597015
CG18259	474	piwi	843	0.45	0.62	0.41	0.66129
CG18302	406	piwi	843	0.45	0.64	0.4	0.625
CG18808	385	piwi	843	0.45	0.65	0.4	0.615385
CG18823	106	piwi	843	0.45	0.76	0.37	0.486842
CG30371	399	piwi	843	0.45	0.6	0.41	0.683333
CG31274	280	piwi	843	0.45	0.67	0.4	0.597015
CG31788	59	piwi	843	0.45	0.77	0.37	0.480519
CG32695	79	piwi	843	0.45	0.78	0.36	0.461538
CG33060	121	piwi	843	0.45	0.78	0.37	0.474359
CG33339	313	piwi	843	0.45	0.72	0.38	0.527778
CG34002	350	piwi	843	0.45	0.62	0.41	0.66129
CG4042	284	piwi	843	0.45	0.68	0.39	0.573529
CG42379	84	piwi	843	0.45	0.8	0.37	0.4625
CG42391	253	piwi	843	0.45	0.69	0.39	0.565217
CG42564	500	piwi	843	0.45	0.65	0.4	0.615385
CG42655	154	piwi	843	0.45	0.75	0.38	0.506667
CG43307	83	piwi	843	0.45	0.8	0.37	0.4625
CG43777	273	piwi	843	0.45	0.65	0.4	0.615385
CG4408	479	piwi	843	0.45	0.64	0.4	0.625
CG45764	214	piwi	843	0.45	0.7	0.38	0.542857
CG5565	240	piwi	843	0.45	0.69	0.4	0.57971
CG5938	168	piwi	843	0.45	0.76	0.37	0.486842
CG8952	276	piwi	843	0.45	0.7	0.38	0.542857
CG9483	242	piwi	843	0.45	0.73	0.39	0.534247
CG9628	175	piwi	843	0.45	0.76	0.38	0.5
CheB93b	203	piwi	843	0.45	0.73	0.38	0.520548
Cow	632	piwi	843	0.45	0.55	0.42	0.763636
COX5BL	154	piwi	843	0.45	0.76	0.37	0.486842
Cpr65Ea	127	piwi	843	0.45	0.74	0.37	0.5
CSN1a	364	piwi	843	0.45	0.65	0.4	0.615385
ect	589	piwi	843	0.45	0.58	0.42	0.724138
GILT3	216	piwi	843	0.45	0.74	0.37	0.5
Hel25E	424	piwi	843	0.45	0.59	0.41	0.694915
hng1	315	piwi	843	0.45	0.68	0.39	0.573529
hoe2	846	piwi	843	0.45	0.58	0.42	0.724138
Idgf6	452	piwi	843	0.45	0.67	0.4	0.597015
Mipp2	453	piwi	843	0.45	0.65	0.4	0.615385
mRpL33	64	piwi	843	0.45	0.79	0.36	0.455696
mRpS10	173	piwi	843	0.45	0.75	0.38	0.506667
NT1	1042	piwi	843	0.45	0.48	0.44	0.916667
Nulp1	702	piwi	843	0.45	0.55	0.43	0.781818
Nup214	1711	piwi	843	0.45	0.47	0.45	0.957447
Osi22	332	piwi	843	0.45	0.65	0.39	0.6
Pka-C1	353	piwi	843	0.45	0.63	0.4	0.634921
Pop5	145	piwi	843	0.45	0.78	0.37	0.474359
PPP4R2r	609	piwi	843	0.45	0.58	0.42	0.724138
qless	436	piwi	843	0.45	0.67	0.4	0.597015
Reph	401	piwi	843	0.45	0.63	0.4	0.634921
robl22E	97	piwi	843	0.45	0.79	0.37	0.468354
RpS15Ab	130	piwi	843	0.45	0.74	0.37	0.5
RpS25	117	piwi	843	0.45	0.78	0.36	0.461538
sel	189	piwi	843	0.45	0.72	0.39	0.541667
sle	1430	piwi	843	0.45	0.45	0.45	1
solo	1031	piwi	843	0.45	0.48	0.44	0.916667
vas	661	piwi	843	0.45	0.53	0.43	0.811321
alphaTub67C	462	piwi	843	0.44	0.58	0.4	0.689655
beat-IIIa	343	piwi	843	0.44	0.68	0.38	0.558824
CG10038	325	piwi	843	0.44	0.7	0.37	0.528571
CG11030	332	piwi	843	0.44	0.67	0.38	0.567164
CG11370	346	piwi	843	0.44	0.65	0.39	0.6
CG12863	437	piwi	843	0.44	0.63	0.4	0.634921
CG13101	318	piwi	843	0.44	0.71	0.37	0.521127
CG13339	152	piwi	843	0.44	0.74	0.36	0.486486
CG13430	267	piwi	843	0.44	0.68	0.37	0.544118
CG13724	550	piwi	843	0.44	0.59	0.4	0.677966
CG14309	966	piwi	843	0.44	0.5	0.43	0.86
CG14506	404	piwi	843	0.44	0.62	0.4	0.645161
CG1468	206	piwi	843	0.44	0.72	0.37	0.513889
CG14877	254	piwi	843	0.44	0.71	0.37	0.521127
CG15239	493	piwi	843	0.44	0.65	0.39	0.6
CG15563	116	piwi	843	0.44	0.75	0.36	0.48
CG16837	130	piwi	843	0.44	0.78	0.36	0.461538
CG2608	255	piwi	843	0.44	0.74	0.36	0.486486
CG2652	235	piwi	843	0.44	0.73	0.36	0.493151
CG31267	275	piwi	843	0.44	0.66	0.38	0.575758
CG31275	101	piwi	843	0.44	0.79	0.36	0.455696
CG31337	104	piwi	843	0.44	0.78	0.35	0.448718
CG31559	454	piwi	843	0.44	0.63	0.39	0.619048
CG31680	147	piwi	843	0.44	0.75	0.37	0.493333
CG31730	162	piwi	843	0.44	0.69	0.38	0.550725
CG3348	98	piwi	843	0.44	0.77	0.35	0.454545
CG33772	185	piwi	843	0.44	0.73	0.36	0.493151
CG34049	306	piwi	843	0.44	0.63	0.39	0.619048
CG3781	221	piwi	843	0.44	0.72	0.38	0.527778
CG4074	316	piwi	843	0.44	0.7	0.37	0.528571
CG4259	270	piwi	843	0.44	0.66	0.38	0.575758
CG42663	662	piwi	843	0.44	0.54	0.42	0.777778
CG43050	172	piwi	843	0.44	0.76	0.36	0.473684
CG45766	214	piwi	843	0.44	0.72	0.37	0.513889
CG4594	280	piwi	843	0.44	0.67	0.38	0.567164
CG5276	419	piwi	843	0.44	0.64	0.39	0.609375
CG6283	339	piwi	843	0.44	0.69	0.37	0.536232
CG6565	425	piwi	843	0.44	0.69	0.38	0.550725
CG7137	358	piwi	843	0.44	0.71	0.37	0.521127
CG7252	474	piwi	843	0.44	0.61	0.4	0.655738
CG7903	384	piwi	843	0.44	0.65	0.39	0.6
CG8292	287	piwi	843	0.44	0.67	0.38	0.567164
Coprox	390	piwi	843	0.44	0.68	0.39	0.573529
Cpr51A	144	piwi	843	0.44	0.77	0.36	0.467532
Debcl	300	piwi	843	0.44	0.72	0.37	0.513889
dnd	179	piwi	843	0.44	0.73	0.37	0.506849
dpr14	340	piwi	843	0.44	0.68	0.38	0.558824
Drs	70	piwi	843	0.44	0.8	0.35	0.4375
flz	1693	piwi	843	0.44	0.42	0.45	1.07143
Hydr2	398	piwi	843	0.44	0.67	0.38	0.567164
icln	215	piwi	843	0.44	0.73	0.36	0.493151
kek1	880	piwi	843	0.44	0.5	0.43	0.86
lovit	615	piwi	843	0.44	0.63	0.4	0.634921
Lsd-1	431	piwi	843	0.44	0.63	0.39	0.619048
ltl	817	piwi	843	0.44	0.55	0.41	0.745455
mRpL13	178	piwi	843	0.44	0.73	0.37	0.506849
mRpS6	147	piwi	843	0.44	0.76	0.36	0.473684
Nep2	774	piwi	843	0.44	0.52	0.42	0.807692
Smyd4-4	573	piwi	843	0.44	0.55	0.41	0.745455
Tom7	54	piwi	843	0.44	0.81	0.35	0.432099
TotA	129	piwi	843	0.44	0.75	0.36	0.48
Ttc26	570	piwi	843	0.44	0.56	0.41	0.732143
vanin-like	558	piwi	843	0.44	0.64	0.39	0.609375
Ank	1549	piwi	843	0.43	0.44	0.42	0.954545
Atox1	89	piwi	843	0.43	0.78	0.34	0.435897
Brms1	259	piwi	843	0.43	0.71	0.36	0.507042
bun	1331	piwi	843	0.43	0.45	0.43	0.955556
CalpA	843	piwi	843	0.43	0.5	0.42	0.84
CG10588	1058	piwi	843	0.43	0.58	0.39	0.672414
CG11000	332	piwi	843	0.43	0.64	0.38	0.59375
CG12547	717	piwi	843	0.43	0.6	0.39	0.65
CG12590	333	piwi	843	0.43	0.67	0.37	0.552239
CG12923	323	piwi	843	0.43	0.7	0.36	0.514286
CG13308	233	piwi	843	0.43	0.71	0.36	0.507042
CG13405	190	piwi	843	0.43	0.68	0.36	0.529412
CG13614	348	piwi	843	0.43	0.68	0.36	0.529412
CG13670	266	piwi	843	0.43	0.7	0.37	0.528571
CG13712	117	piwi	843	0.43	0.78	0.35	0.448718
CG1421	188	piwi	843	0.43	0.74	0.36	0.486486
CG14573	192	piwi	843	0.43	0.73	0.35	0.479452
CG15005	750	piwi	843	0.43	0.53	0.41	0.773585
CG15116	193	piwi	843	0.43	0.73	0.36	0.493151
CG15125	282	piwi	843	0.43	0.7	0.37	0.528571
CG2116	598	piwi	843	0.43	0.57	0.39	0.684211
CG31230	59	piwi	843	0.43	0.77	0.34	0.441558
CG31344	403	piwi	843	0.43	0.68	0.37	0.544118
CG31689	624	piwi	843	0.43	0.61	0.39	0.639344
CG32262	273	piwi	843	0.43	0.69	0.36	0.521739
CG32448	85	piwi	843	0.43	0.79	0.34	0.43038
CG32767	1281	piwi	843	0.43	0.45	0.42	0.933333
CG33695	305	piwi	843	0.43	0.67	0.37	0.552239
CG34125	159	piwi	843	0.43	0.75	0.35	0.466667
CG40439	171	piwi	843	0.43	0.74	0.35	0.472973
CG42249	558	piwi	843	0.43	0.55	0.4	0.727273
CG4291	338	piwi	843	0.43	0.67	0.37	0.552239
CG44090	99	piwi	843	0.43	0.78	0.34	0.435897
CG4615	313	piwi	843	0.43	0.69	0.37	0.536232
CG4669	611	piwi	843	0.43	0.56	0.4	0.714286
CG4942	351	piwi	843	0.43	0.68	0.36	0.529412
CG6066	463	piwi	843	0.43	0.61	0.38	0.622951
CG6115	85	piwi	843	0.43	0.8	0.33	0.4125
CG6961	474	piwi	843	0.43	0.61	0.38	0.622951
CG7156	681	piwi	843	0.43	0.59	0.38	0.644068
CG7208	450	piwi	843	0.43	0.63	0.38	0.603175
CG7248	796	piwi	843	0.43	0.53	0.41	0.773585
CG8414	995	piwi	843	0.43	0.56	0.4	0.714286
CG9801	709	piwi	843	0.43	0.53	0.41	0.773585
cue	644	piwi	843	0.43	0.6	0.39	0.65
Drsl2	70	piwi	843	0.43	0.79	0.34	0.43038
ecd	684	piwi	843	0.43	0.53	0.4	0.754717
Fbxo42	667	piwi	843	0.43	0.62	0.38	0.612903
fipi	450	piwi	843	0.43	0.64	0.38	0.59375
fwe	194	piwi	843	0.43	0.7	0.36	0.514286
Gel	798	piwi	843	0.43	0.58	0.39	0.672414
glob3	196	piwi	843	0.43	0.74	0.35	0.472973
Gpa2	129	piwi	843	0.43	0.77	0.34	0.441558
Gr64c	419	piwi	843	0.43	0.66	0.37	0.560606
Ice2	684	piwi	843	0.43	0.56	0.39	0.696429
jhamt	297	piwi	843	0.43	0.67	0.37	0.552239
jus	509	piwi	843	0.43	0.6	0.38	0.633333
jvl	1315	piwi	843	0.43	0.45	0.43	0.955556
kappaTry	263	piwi	843	0.43	0.66	0.38	0.575758
Lrt	830	piwi	843	0.43	0.54	0.41	0.759259
Magi	1202	piwi	843	0.43	0.46	0.42	0.913043
NimB2	421	piwi	843	0.43	0.61	0.38	0.622951
NiPp1	383	piwi	843	0.43	0.63	0.38	0.603175
Nrt	846	piwi	843	0.43	0.51	0.41	0.803922
Obp8a	163	piwi	843	0.43	0.76	0.34	0.447368
pasi1	169	piwi	843	0.43	0.73	0.36	0.493151
ppk30	457	piwi	843	0.43	0.65	0.37	0.569231
SmD2	119	piwi	843	0.43	0.78	0.34	0.435897
SmydA-8	462	piwi	843	0.43	0.58	0.39	0.672414
spo	543	piwi	843	0.43	0.58	0.39	0.672414
srw	136	piwi	843	0.43	0.76	0.34	0.447368
wrm2	57	piwi	843	0.43	0.79	0.34	0.43038
yem	1101	piwi	843	0.43	0.48	0.42	0.875
Yp2	442	piwi	843	0.43	0.66	0.37	0.560606
AIMP1	323	piwi	843	0.42	0.67	0.36	0.537313
alphaTub85E	449	piwi	843	0.42	0.59	0.38	0.644068
Atg18a	447	piwi	843	0.42	0.64	0.36	0.5625
aurA	411	piwi	843	0.42	0.66	0.36	0.545455
beag	557	piwi	843	0.42	0.58	0.37	0.637931
CG10920	397	piwi	843	0.42	0.61	0.38	0.622951
CG1103	230	piwi	843	0.42	0.72	0.34	0.472222
CG11034	751	piwi	843	0.42	0.52	0.39	0.75
CG1146	315	piwi	843	0.42	0.64	0.36	0.5625
CG11852	250	piwi	843	0.42	0.71	0.35	0.492958
CG11882	263	piwi	843	0.42	0.72	0.35	0.486111
CG12384	96	piwi	843	0.42	0.8	0.32	0.4
CG12608	443	piwi	843	0.42	0.64	0.36	0.5625
CG13282	484	piwi	843	0.42	0.64	0.36	0.5625
CG13380	169	piwi	843	0.42	0.76	0.33	0.434211
CG13559	114	piwi	843	0.42	0.77	0.33	0.428571
CG13841	120	piwi	843	0.42	0.77	0.33	0.428571
CG14491	166	piwi	843	0.42	0.74	0.34	0.459459
CG1542	307	piwi	843	0.42	0.65	0.36	0.553846
CG15458	63	piwi	843	0.42	0.79	0.33	0.417722
CG15482	309	piwi	843	0.42	0.66	0.36	0.545455
CG17883	378	piwi	843	0.42	0.68	0.35	0.514706
CG2765	243	piwi	843	0.42	0.7	0.35	0.5
CG2812	348	piwi	843	0.42	0.67	0.35	0.522388
CG30100	146	piwi	843	0.42	0.74	0.34	0.459459
CG3038	388	piwi	843	0.42	0.67	0.36	0.537313
CG31706	351	piwi	843	0.42	0.66	0.36	0.545455
CG32110	411	piwi	843	0.42	0.61	0.37	0.606557
CG32302	313	piwi	843	0.42	0.7	0.35	0.5
CG32643	101	piwi	843	0.42	0.75	0.34	0.453333
CG32945	166	piwi	843	0.42	0.74	0.34	0.459459
CG34206	275	piwi	843	0.42	0.68	0.35	0.514706
CG4036	304	piwi	843	0.42	0.71	0.35	0.492958
CG42580	99	piwi	843	0.42	0.74	0.34	0.459459
CG42826	473	piwi	843	0.42	0.66	0.36	0.545455
CG4325	158	piwi	843	0.42	0.69	0.36	0.521739
CG44245	440	piwi	843	0.42	0.59	0.38	0.644068
CG4511	216	piwi	843	0.42	0.71	0.35	0.492958
CG5262	509	piwi	843	0.42	0.66	0.36	0.545455
CG5280	250	piwi	843	0.42	0.69	0.36	0.521739
CG5421	426	piwi	843	0.42	0.64	0.37	0.578125
CG6142	616	piwi	843	0.42	0.61	0.38	0.622951
CG6299	205	piwi	843	0.42	0.75	0.34	0.453333
CG6429	159	piwi	843	0.42	0.76	0.34	0.447368
CG6470	337	piwi	843	0.42	0.66	0.36	0.545455
CG7025	429	piwi	843	0.42	0.66	0.36	0.545455
CG7637	64	piwi	843	0.42	0.8	0.33	0.4125
CG7798	148	piwi	843	0.42	0.76	0.34	0.447368
CG7991	888	piwi	843	0.42	0.5	0.4	0.8
CG8149	308	piwi	843	0.42	0.69	0.35	0.507246
CG9896	253	piwi	843	0.42	0.72	0.34	0.472222
CheA84a	180	piwi	843	0.42	0.74	0.34	0.459459
Cisd2	133	piwi	843	0.42	0.75	0.34	0.453333
coil	634	piwi	843	0.42	0.57	0.38	0.666667
Diedel2	125	piwi	843	0.42	0.77	0.33	0.428571
dlp	765	piwi	843	0.42	0.51	0.39	0.764706
Dp	445	piwi	843	0.42	0.61	0.38	0.622951
eIF4E5	232	piwi	843	0.42	0.73	0.34	0.465753
Fbl6	720	piwi	843	0.42	0.6	0.37	0.616667
fln	182	piwi	843	0.42	0.73	0.34	0.465753
GlcAT-S	486	piwi	843	0.42	0.65	0.36	0.553846
Gr59f	406	piwi	843	0.42	0.68	0.35	0.514706
gro	730	piwi	843	0.42	0.52	0.4	0.769231
IFT57	405	piwi	843	0.42	0.64	0.36	0.5625
Kat60	605	piwi	843	0.42	0.55	0.39	0.709091
Lamtor1	180	piwi	843	0.42	0.73	0.35	0.479452
LManV	982	piwi	843	0.42	0.6	0.38	0.633333
LSm3	103	piwi	843	0.42	0.78	0.33	0.423077
mRpL52	126	piwi	843	0.42	0.76	0.33	0.434211
Ntmt	276	piwi	843	0.42	0.72	0.35	0.486111
Nup43	358	piwi	843	0.42	0.66	0.35	0.530303
Pex11c	234	piwi	843	0.42	0.69	0.35	0.507246
Prim2	533	piwi	843	0.42	0.57	0.38	0.666667
Rcd6	513	piwi	843	0.42	0.57	0.38	0.666667
RpL30	111	piwi	843	0.42	0.76	0.33	0.434211
RpS15Aa	130	piwi	843	0.42	0.75	0.34	0.453333
Sf3b5	85	piwi	843	0.42	0.77	0.33	0.428571
skl	108	piwi	843	0.42	0.75	0.33	0.44
SLIRP2	91	piwi	843	0.42	0.77	0.34	0.441558
Strump	1191	piwi	843	0.42	0.62	0.37	0.596774
Taf4	1088	piwi	843	0.42	0.47	0.41	0.87234
Takl2	281	piwi	843	0.42	0.69	0.35	0.507246
tfc	376	piwi	843	0.42	0.64	0.37	0.578125
Top2	1447	piwi	843	0.42	0.5	0.39	0.78
Ttc19	369	piwi	843	0.42	0.6	0.37	0.616667
Vps2	256	piwi	843	0.42	0.66	0.36	0.545455
waw	696	piwi	843	0.42	0.61	0.37	0.606557
Zdhhc8	1052	piwi	843	0.42	0.47	0.41	0.87234
Alg13	171	piwi	843	0.41	0.76	0.32	0.421053
alpha-Man-IIa	1109	piwi	843	0.41	0.67	0.35	0.522388
Arfip	355	piwi	843	0.41	0.63	0.36	0.571429
ATPsynO	209	piwi	843	0.41	0.72	0.34	0.472222
babos	196	piwi	843	0.41	0.75	0.33	0.44
be	825	piwi	843	0.41	0.58	0.37	0.637931
Bet5	145	piwi	843	0.41	0.75	0.33	0.44
betaNACtes4	263	piwi	843	0.41	0.69	0.34	0.492754
Bili	828	piwi	843	0.41	0.57	0.37	0.649123
Blos3	144	piwi	843	0.41	0.73	0.33	0.452055
CalpB	925	piwi	843	0.41	0.48	0.39	0.8125
Cdk1	297	piwi	843	0.41	0.68	0.34	0.5
CG10339	603	piwi	843	0.41	0.6	0.36	0.6
CG11099	378	piwi	843	0.41	0.65	0.35	0.538462
CG11672	240	piwi	843	0.41	0.7	0.34	0.485714
CG12078	253	piwi	843	0.41	0.7	0.33	0.471429
CG12231	183	piwi	843	0.41	0.73	0.33	0.452055
CG12256	283	piwi	843	0.41	0.65	0.35	0.538462
CG13982	329	piwi	843	0.41	0.64	0.35	0.546875
CG14252	405	piwi	843	0.41	0.63	0.36	0.571429
CG14591	332	piwi	843	0.41	0.63	0.35	0.555556
CG14797	221	piwi	843	0.41	0.7	0.33	0.471429
CG14969	315	piwi	843	0.41	0.67	0.35	0.522388
CG14971	469	piwi	843	0.41	0.58	0.37	0.637931
CG15082	296	piwi	843	0.41	0.67	0.34	0.507463
CG15347	229	piwi	843	0.41	0.71	0.34	0.478873
CG15578	89	piwi	843	0.41	0.76	0.33	0.434211
CG18563	379	piwi	843	0.41	0.66	0.35	0.530303
CG2336	322	piwi	843	0.41	0.68	0.35	0.514706
CG30403	302	piwi	843	0.41	0.68	0.35	0.514706
CG30430	51	piwi	843	0.41	0.77	0.31	0.402597
CG3165	351	piwi	843	0.41	0.63	0.36	0.571429
CG31797	868	piwi	843	0.41	0.51	0.38	0.745098
CG31908	392	piwi	843	0.41	0.63	0.36	0.571429
CG3191	309	piwi	843	0.41	0.64	0.35	0.546875
CG31926	410	piwi	843	0.41	0.6	0.37	0.616667
CG31928	418	piwi	843	0.41	0.67	0.35	0.522388
CG32119	484	piwi	843	0.41	0.57	0.37	0.649123
CG32987	257	piwi	843	0.41	0.69	0.34	0.492754
CG33120	689	piwi	843	0.41	0.58	0.36	0.62069
CG3342	453	piwi	843	0.41	0.63	0.35	0.555556
CG33459	284	piwi	843	0.41	0.69	0.34	0.492754
CG34034	135	piwi	843	0.41	0.77	0.32	0.415584
CG34170	62	piwi	843	0.41	0.76	0.32	0.421053
CG34309	101	piwi	843	0.41	0.78	0.32	0.410256
CG34423	85	piwi	843	0.41	0.8	0.32	0.4
CG3611	121	piwi	843	0.41	0.73	0.33	0.452055
CG42264	634	piwi	843	0.41	0.54	0.38	0.703704
CG43052	131	piwi	843	0.41	0.72	0.33	0.458333
CG43218	182	piwi	843	0.41	0.72	0.33	0.458333
CG43315	120	piwi	843	0.41	0.77	0.32	0.415584
CG43341	103	piwi	843	0.41	0.76	0.32	0.421053
CG4565	269	piwi	843	0.41	0.64	0.35	0.546875
CG4783	86	piwi	843	0.41	0.76	0.32	0.421053
CG5731	413	piwi	843	0.41	0.66	0.35	0.530303
CG7352	466	piwi	843	0.41	0.62	0.36	0.580645
CG7381	712	piwi	843	0.41	0.57	0.37	0.649123
CG8507	379	piwi	843	0.41	0.64	0.35	0.546875
CG8963	559	piwi	843	0.41	0.58	0.37	0.637931
CG8993	142	piwi	843	0.41	0.73	0.33	0.452055
CG9775	421	piwi	843	0.41	0.62	0.35	0.564516
CheB42b	196	piwi	843	0.41	0.71	0.33	0.464789
COX6B	96	piwi	843	0.41	0.79	0.31	0.392405
Dim1	142	piwi	843	0.41	0.76	0.33	0.434211
ea	392	piwi	843	0.41	0.67	0.35	0.522388
Eip74EF	883	piwi	843	0.41	0.51	0.38	0.745098
escl	462	piwi	843	0.41	0.62	0.35	0.564516
fd59A	456	piwi	843	0.41	0.63	0.36	0.571429
Fnta	331	piwi	843	0.41	0.62	0.36	0.580645
Gasp	258	piwi	843	0.41	0.69	0.33	0.478261
Gem3	1028	piwi	843	0.41	0.52	0.38	0.730769
Grx1t	116	piwi	843	0.41	0.76	0.32	0.421053
Hsp83	717	piwi	843	0.41	0.51	0.38	0.745098
insc	859	piwi	843	0.41	0.52	0.39	0.75
Inx3	395	piwi	843	0.41	0.65	0.35	0.538462
Ipp	375	piwi	843	0.41	0.68	0.35	0.514706
JMJD4	425	piwi	843	0.41	0.58	0.37	0.637931
Krn	217	piwi	843	0.41	0.7	0.34	0.485714
Lamtor5	100	piwi	843	0.41	0.79	0.31	0.392405
lectin-46Cb	322	piwi	843	0.41	0.63	0.35	0.555556
mago	147	piwi	843	0.41	0.76	0.32	0.421053
mRpS25	167	piwi	843	0.41	0.76	0.33	0.434211
Mst84Db	74	piwi	843	0.41	0.78	0.31	0.397436
Mulk	408	piwi	843	0.41	0.6	0.37	0.616667
ND-B14.7	170	piwi	843	0.41	0.76	0.32	0.421053
ND-B8	95	piwi	843	0.41	0.78	0.32	0.410256
obst-B	337	piwi	843	0.41	0.67	0.34	0.507463
Patr-1	968	piwi	843	0.41	0.49	0.39	0.795918
Pex12	297	piwi	843	0.41	0.7	0.33	0.471429
Phae2	265	piwi	843	0.41	0.67	0.35	0.522388
Phax	453	piwi	843	0.41	0.62	0.35	0.564516
Pisd	447	piwi	843	0.41	0.58	0.36	0.62069
Pp1-87B	302	piwi	843	0.41	0.68	0.34	0.5
RpL35A	157	piwi	843	0.41	0.76	0.32	0.421053
SA-2	973	piwi	843	0.41	0.5	0.39	0.78
Sem1	79	piwi	843	0.41	0.8	0.31	0.3875
Sems	275	piwi	843	0.41	0.66	0.34	0.515152
shd	540	piwi	843	0.41	0.6	0.37	0.616667
side-VII	939	piwi	843	0.41	0.49	0.39	0.795918
Smug	280	piwi	843	0.41	0.69	0.34	0.492754
Spn43Ad	407	piwi	843	0.41	0.67	0.34	0.507463
Sr-CI	629	piwi	843	0.41	0.6	0.36	0.6
Srrm234	1655	piwi	843	0.41	0.43	0.41	0.953488
SsRbeta	190	piwi	843	0.41	0.75	0.32	0.426667
Wdfy2	408	piwi	843	0.41	0.64	0.35	0.546875
alphaTub84D	450	piwi	843	0.4	0.58	0.35	0.603448
Ance	615	piwi	843	0.4	0.53	0.36	0.679245
arg	351	piwi	843	0.4	0.66	0.33	0.5
CaBP1	433	piwi	843	0.4	0.6	0.35	0.583333
Calr	406	piwi	843	0.4	0.64	0.35	0.546875
Cdc2rk	387	piwi	843	0.4	0.6	0.35	0.583333
CG10211	1394	piwi	843	0.4	0.52	0.37	0.711538
CG10405	268	piwi	843	0.4	0.65	0.34	0.523077
CG10479	379	piwi	843	0.4	0.65	0.34	0.523077
CG10747	328	piwi	843	0.4	0.67	0.33	0.492537
CG10834	97	piwi	843	0.4	0.77	0.31	0.402597
CG11504	410	piwi	843	0.4	0.63	0.35	0.555556
CG12116	273	piwi	843	0.4	0.67	0.33	0.492537
CG12438	241	piwi	843	0.4	0.68	0.33	0.485294
CG1299	511	piwi	843	0.4	0.56	0.36	0.642857
CG13042	117	piwi	843	0.4	0.78	0.31	0.397436
CG13046	181	piwi	843	0.4	0.71	0.32	0.450704
CG13155	236	piwi	843	0.4	0.71	0.33	0.464789
CG13230	72	piwi	843	0.4	0.78	0.31	0.397436
CG13313	415	piwi	843	0.4	0.65	0.33	0.507692
CG13373	177	piwi	843	0.4	0.73	0.32	0.438356
CG13962	152	piwi	843	0.4	0.75	0.31	0.413333
CG14464	116	piwi	843	0.4	0.76	0.3	0.394737
CG14780	302	piwi	843	0.4	0.63	0.35	0.555556
CG15199	116	piwi	843	0.4	0.76	0.3	0.394737
CG15209	147	piwi	843	0.4	0.75	0.31	0.413333
CG16717	300	piwi	843	0.4	0.68	0.33	0.485294
CG17746	371	piwi	843	0.4	0.6	0.35	0.583333
CG18540	190	piwi	843	0.4	0.75	0.32	0.426667
CG30010	215	piwi	843	0.4	0.74	0.32	0.432432
CG31296	280	piwi	843	0.4	0.71	0.32	0.450704
CG31633	408	piwi	843	0.4	0.66	0.34	0.515152
CG31704	68	piwi	843	0.4	0.78	0.3	0.384615
CG32037	252	piwi	843	0.4	0.7	0.33	0.471429
CG32071	150	piwi	843	0.4	0.75	0.31	0.413333
CG32855	552	piwi	843	0.4	0.58	0.35	0.603448
CG33995	127	piwi	843	0.4	0.76	0.31	0.407895
CG34015	139	piwi	843	0.4	0.74	0.32	0.432432
CG34133	1108	piwi	843	0.4	0.46	0.38	0.826087
CG34210	94	piwi	843	0.4	0.78	0.31	0.397436
CG34266	88	piwi	843	0.4	0.77	0.31	0.402597
CG42342	831	piwi	843	0.4	0.51	0.37	0.72549
CG42465	73	piwi	843	0.4	0.78	0.3	0.384615
CG43386	208	piwi	843	0.4	0.72	0.32	0.444444
CG43773	75	piwi	843	0.4	0.77	0.31	0.402597
CG43851	145	piwi	843	0.4	0.76	0.31	0.407895
CG44271	106	piwi	843	0.4	0.77	0.31	0.402597
CG46394	104	piwi	843	0.4	0.77	0.31	0.402597
CG46442	115	piwi	843	0.4	0.77	0.31	0.402597
CG5693	72	piwi	843	0.4	0.79	0.31	0.392405
CG5758	625	piwi	843	0.4	0.54	0.36	0.666667
CG6254	634	piwi	843	0.4	0.57	0.36	0.631579
CG6770	69	piwi	843	0.4	0.8	0.3	0.375
CG7101	352	piwi	843	0.4	0.63	0.35	0.555556
CG7251	321	piwi	843	0.4	0.67	0.33	0.492537
CG7378	235	piwi	843	0.4	0.71	0.32	0.450704
CG7506	236	piwi	843	0.4	0.71	0.32	0.450704
CG7988	276	piwi	843	0.4	0.7	0.32	0.457143
CG8172	561	piwi	843	0.4	0.63	0.34	0.539683
CG8407	104	piwi	843	0.4	0.77	0.31	0.402597
CG8435	333	piwi	843	0.4	0.68	0.33	0.485294
CG8673	420	piwi	843	0.4	0.6	0.35	0.583333
CG9016	85	piwi	843	0.4	0.75	0.31	0.413333
CG9368	182	piwi	843	0.4	0.7	0.32	0.457143
CkIalpha	337	piwi	843	0.4	0.67	0.34	0.507463
DCTN2-p50	380	piwi	843	0.4	0.64	0.34	0.53125
Der-2	261	piwi	843	0.4	0.7	0.32	0.457143
dpr12	326	piwi	843	0.4	0.68	0.33	0.485294
dpr5	336	piwi	843	0.4	0.68	0.33	0.485294
Fmo-2	429	piwi	843	0.4	0.65	0.34	0.523077
galla-1	218	piwi	843	0.4	0.69	0.33	0.478261
IFT54	588	piwi	843	0.4	0.59	0.36	0.610169
Ilp4	134	piwi	843	0.4	0.75	0.31	0.413333
Ilp5	108	piwi	843	0.4	0.78	0.31	0.397436
jdp	195	piwi	843	0.4	0.71	0.32	0.450704
Lamtor2	125	piwi	843	0.4	0.77	0.31	0.402597
LManIV	978	piwi	843	0.4	0.59	0.35	0.59322
LSm7	110	piwi	843	0.4	0.75	0.31	0.413333
Mf	365	piwi	843	0.4	0.65	0.34	0.523077
mge	148	piwi	843	0.4	0.73	0.32	0.438356
Mnat9	200	piwi	843	0.4	0.68	0.32	0.470588
mRpS18B	204	piwi	843	0.4	0.74	0.32	0.432432
mRpS28	194	piwi	843	0.4	0.74	0.31	0.418919
Mst84Da	63	piwi	843	0.4	0.78	0.3	0.384615
Nil	371	piwi	843	0.4	0.67	0.33	0.492537
Pex2	281	piwi	843	0.4	0.68	0.33	0.485294
PH4alphaMP	535	piwi	843	0.4	0.56	0.36	0.642857
RanGAP	596	piwi	843	0.4	0.56	0.36	0.642857
RpL27	135	piwi	843	0.4	0.77	0.31	0.402597
RpL38	70	piwi	843	0.4	0.81	0.3	0.37037
RpS11	155	piwi	843	0.4	0.73	0.32	0.438356
RpS21	83	piwi	843	0.4	0.79	0.3	0.379747
Sap-r	953	piwi	843	0.4	0.5	0.38	0.76
SdhC	171	piwi	843	0.4	0.74	0.31	0.418919
Sirup	118	piwi	843	0.4	0.72	0.32	0.444444
SmF	88	piwi	843	0.4	0.76	0.3	0.394737
Smyd3	468	piwi	843	0.4	0.58	0.35	0.603448
sowah	780	piwi	843	0.4	0.52	0.37	0.711538
spir	1020	piwi	843	0.4	0.49	0.38	0.77551
Sr-CII	599	piwi	843	0.4	0.59	0.35	0.59322
stas	320	piwi	843	0.4	0.69	0.33	0.478261
Toll-9	900	piwi	843	0.4	0.54	0.36	0.666667
tth	428	piwi	843	0.4	0.62	0.35	0.564516
twe	426	piwi	843	0.4	0.63	0.34	0.539683
vir-1	431	piwi	843	0.4	0.62	0.35	0.564516
Vps29	182	piwi	843	0.4	0.71	0.32	0.450704
wde	1420	piwi	843	0.4	0.44	0.39	0.886364
wrm1	162	piwi	843	0.4	0.74	0.32	0.432432
yellow-c	438	piwi	843	0.4	0.65	0.34	0.523077
ymp	186	piwi	843	0.4	0.72	0.32	0.444444
Ype	121	piwi	843	0.4	0.77	0.31	0.402597
Ythdf	700	piwi	843	0.4	0.56	0.36	0.642857
Arpc4	168	piwi	843	0.39	0.74	0.3	0.405405
Art6	341	piwi	843	0.39	0.67	0.31	0.462687
BEAF-32	283	piwi	843	0.39	0.7	0.31	0.442857
beat-Ia	437	piwi	843	0.39	0.64	0.33	0.515625
CAHbeta	255	piwi	843	0.39	0.7	0.31	0.442857
CG10465	301	piwi	843	0.39	0.66	0.32	0.484848
CG10516	342	piwi	843	0.39	0.69	0.32	0.463768
CG10874	317	piwi	843	0.39	0.66	0.32	0.484848
CG11619	699	piwi	843	0.39	0.53	0.35	0.660377
CG11815	283	piwi	843	0.39	0.68	0.31	0.455882
CG12025	170	piwi	843	0.39	0.71	0.31	0.43662
CG12204	323	piwi	843	0.39	0.67	0.33	0.492537
CG13039	124	piwi	843	0.39	0.73	0.3	0.410959
CG13360	421	piwi	843	0.39	0.63	0.32	0.507937
CG13364	64	piwi	843	0.39	0.8	0.29	0.3625
CG13558	195	piwi	843	0.39	0.72	0.3	0.416667
CG13566	202	piwi	843	0.39	0.73	0.31	0.424658
CG13898	151	piwi	843	0.39	0.72	0.31	0.430556
CG14220	327	piwi	843	0.39	0.67	0.32	0.477612
CG14298	111	piwi	843	0.39	0.75	0.29	0.386667
CG14315	217	piwi	843	0.39	0.7	0.31	0.442857
CG14427	252	piwi	843	0.39	0.67	0.32	0.477612
CG14689	487	piwi	843	0.39	0.65	0.33	0.507692
CG14894	263	piwi	843	0.39	0.65	0.32	0.492308
CG15212	63	piwi	843	0.39	0.79	0.29	0.367089
CG15282	79	piwi	843	0.39	0.78	0.29	0.371795
CG15628	364	piwi	843	0.39	0.63	0.33	0.52381
CG15643	212	piwi	843	0.39	0.72	0.3	0.416667
CG15747	387	piwi	843	0.39	0.65	0.32	0.492308
CG17207	220	piwi	843	0.39	0.7	0.32	0.457143
CG17290	99	piwi	843	0.39	0.77	0.29	0.376623
CG17404	275	piwi	843	0.39	0.67	0.32	0.477612
CG1840	118	piwi	843	0.39	0.77	0.29	0.376623
CG1927	213	piwi	843	0.39	0.71	0.31	0.43662
CG2556	470	piwi	843	0.39	0.61	0.34	0.557377
CG2865	434	piwi	843	0.39	0.62	0.33	0.532258
CG2962	376	piwi	843	0.39	0.61	0.34	0.557377
CG31223	394	piwi	843	0.39	0.68	0.32	0.470588
CG31253	379	piwi	843	0.39	0.62	0.33	0.532258
CG31407	156	piwi	843	0.39	0.74	0.3	0.405405
CG31775	89	piwi	843	0.39	0.78	0.29	0.371795
CG31886	554	piwi	843	0.39	0.58	0.35	0.603448
CG32756	459	piwi	843	0.39	0.63	0.33	0.52381
CG34198	59	piwi	843	0.39	0.79	0.29	0.367089
CG34286	88	piwi	843	0.39	0.77	0.3	0.38961
CG34445	134	piwi	843	0.39	0.76	0.29	0.381579
CG3739	485	piwi	843	0.39	0.62	0.33	0.532258
CG3823	295	piwi	843	0.39	0.69	0.31	0.449275
CG42233	773	piwi	843	0.39	0.51	0.37	0.72549
CG42288	160	piwi	843	0.39	0.75	0.3	0.4
CG42361	207	piwi	843	0.39	0.71	0.31	0.43662
CG42497	65	piwi	843	0.39	0.8	0.28	0.35
CG42542	503	piwi	843	0.39	0.58	0.34	0.586207
CG42692	148	piwi	843	0.39	0.74	0.3	0.405405
CG43400	112	piwi	843	0.39	0.75	0.3	0.4
CG44139	56	piwi	843	0.39	0.79	0.29	0.367089
CG45063	252	piwi	843	0.39	0.7	0.32	0.457143
CG46387	145	piwi	843	0.39	0.72	0.31	0.430556
CG46428	93	piwi	843	0.39	0.79	0.28	0.35443
CG4734	325	piwi	843	0.39	0.66	0.33	0.5
CG4892	238	piwi	843	0.39	0.71	0.3	0.422535
CG4950	574	piwi	843	0.39	0.63	0.33	0.52381
CG6700	874	piwi	843	0.39	0.5	0.37	0.74
CG6749	552	piwi	843	0.39	0.62	0.33	0.532258
CG6878	79	piwi	843	0.39	0.79	0.29	0.367089
CG7564	420	piwi	843	0.39	0.64	0.32	0.5
cnn	1378	piwi	843	0.39	0.46	0.37	0.804348
Fic	492	piwi	843	0.39	0.62	0.34	0.548387
Fmo-1	416	piwi	843	0.39	0.64	0.33	0.515625
grnd	241	piwi	843	0.39	0.7	0.31	0.442857
Ilp3	120	piwi	843	0.39	0.76	0.3	0.394737
ImpE2	466	piwi	843	0.39	0.6	0.34	0.566667
Jabba	560	piwi	843	0.39	0.58	0.34	0.586207
Karybeta3	1105	piwi	843	0.39	0.55	0.35	0.636364
Lamtor3	124	piwi	843	0.39	0.77	0.3	0.38961
LManVI	1007	piwi	843	0.39	0.6	0.34	0.566667
Mos	364	piwi	843	0.39	0.65	0.32	0.492308
mRpL42	124	piwi	843	0.39	0.77	0.29	0.376623
mRpL9	248	piwi	843	0.39	0.72	0.3	0.416667
Mst84Dc	55	piwi	843	0.39	0.79	0.3	0.379747
Mst84Dd	72	piwi	843	0.39	0.78	0.29	0.371795
Mst87F	56	piwi	843	0.39	0.78	0.29	0.371795
Mtch	316	piwi	843	0.39	0.68	0.32	0.470588
NC2alpha	341	piwi	843	0.39	0.64	0.33	0.515625
ND-B14	124	piwi	843	0.39	0.76	0.29	0.381579
Nup93-2	796	piwi	843	0.39	0.55	0.35	0.636364
Ocho	149	piwi	843	0.39	0.72	0.3	0.416667
Osi15	214	piwi	843	0.39	0.7	0.31	0.442857
pasi2	258	piwi	843	0.39	0.72	0.31	0.430556
Pex7	339	piwi	843	0.39	0.66	0.32	0.484848
pira	681	piwi	843	0.39	0.59	0.34	0.576271
plu	174	piwi	843	0.39	0.72	0.31	0.430556
PNKP	523	piwi	843	0.39	0.58	0.34	0.586207
ppk23	591	piwi	843	0.39	0.6	0.34	0.566667
PRAS40	562	piwi	843	0.39	0.57	0.34	0.596491
psh	394	piwi	843	0.39	0.63	0.33	0.52381
Pxn	1527	piwi	843	0.39	0.44	0.37	0.840909
qvr	158	piwi	843	0.39	0.74	0.3	0.405405
RpL39	51	piwi	843	0.39	0.8	0.29	0.3625
Rpn12	264	piwi	843	0.39	0.69	0.32	0.463768
RpS28a	64	piwi	843	0.39	0.78	0.29	0.371795
sau	294	piwi	843	0.39	0.68	0.32	0.470588
SmydA-4	532	piwi	843	0.39	0.56	0.35	0.625
spd-2	1146	piwi	843	0.39	0.47	0.37	0.787234
spn-B	341	piwi	843	0.39	0.63	0.33	0.52381
Spn77Bc	416	piwi	843	0.39	0.65	0.32	0.492308
spz4	597	piwi	843	0.39	0.61	0.33	0.540984
stnA	850	piwi	843	0.39	0.52	0.36	0.692308
TAF1B	872	piwi	843	0.39	0.5	0.36	0.72
Trf4-2	407	piwi	843	0.39	0.64	0.33	0.515625
Tsf1	641	piwi	843	0.39	0.57	0.34	0.596491
UQCR-6.4	57	piwi	843	0.39	0.82	0.28	0.341463
VhaSFD	542	piwi	843	0.39	0.59	0.33	0.559322
Vti1b	122	piwi	843	0.39	0.77	0.3	0.38961
wls	594	piwi	843	0.39	0.61	0.33	0.540984
Wnt2	352	piwi	843	0.39	0.67	0.32	0.477612
Xbp1	498	piwi	843	0.39	0.6	0.34	0.566667
apt	499	piwi	843	0.38	0.6	0.33	0.55
Arf4	180	piwi	843	0.38	0.71	0.29	0.408451
Arf6	175	piwi	843	0.38	0.72	0.3	0.416667
ArfGAP3	553	piwi	843	0.38	0.57	0.34	0.596491
ari-1	503	piwi	843	0.38	0.56	0.34	0.607143
ari-2	509	piwi	843	0.38	0.57	0.33	0.578947
Atat	461	piwi	843	0.38	0.61	0.32	0.52459
beat-Ib	327	piwi	843	0.38	0.65	0.31	0.476923
bug	295	piwi	843	0.38	0.7	0.3	0.428571
CAH3	250	piwi	843	0.38	0.7	0.3	0.428571
CG10257	228	piwi	843	0.38	0.71	0.3	0.422535
CG10477	272	piwi	843	0.38	0.67	0.3	0.447761
CG11110	171	piwi	843	0.38	0.73	0.29	0.39726
CG11905	607	piwi	843	0.38	0.57	0.33	0.578947
CG13108	233	piwi	843	0.38	0.69	0.31	0.449275
CG13126	463	piwi	843	0.38	0.63	0.32	0.507937
CG13217	113	piwi	843	0.38	0.76	0.28	0.368421
CG13252	384	piwi	843	0.38	0.63	0.32	0.507937
CG13365	114	piwi	843	0.38	0.78	0.28	0.358974
CG13653	235	piwi	843	0.38	0.71	0.3	0.422535
CG13850	564	piwi	843	0.38	0.57	0.33	0.578947
CG14085	874	piwi	843	0.38	0.56	0.33	0.589286
CG14086	212	piwi	843	0.38	0.7	0.3	0.428571
CG14230	580	piwi	843	0.38	0.6	0.33	0.55
CG14327	153	piwi	843	0.38	0.74	0.29	0.391892
CG14422	294	piwi	843	0.38	0.67	0.31	0.462687
CG15107	243	piwi	843	0.38	0.7	0.3	0.428571
CG15478	552	piwi	843	0.38	0.58	0.32	0.551724
CG15765	873	piwi	843	0.38	0.5	0.35	0.7
CG16852	237	piwi	843	0.38	0.69	0.3	0.434783
CG17154	122	piwi	843	0.38	0.75	0.29	0.386667
CG17239	248	piwi	843	0.38	0.7	0.3	0.428571
CG17982	301	piwi	843	0.38	0.67	0.3	0.447761
CG17996	118	piwi	843	0.38	0.78	0.28	0.358974
CG1890	110	piwi	843	0.38	0.78	0.28	0.358974
CG1943	118	piwi	843	0.38	0.76	0.28	0.368421
CG2157	247	piwi	843	0.38	0.66	0.31	0.469697
CG2816	84	piwi	843	0.38	0.78	0.29	0.371795
CG31013	534	piwi	843	0.38	0.59	0.32	0.542373
CG31086	148	piwi	843	0.38	0.73	0.29	0.39726
CG31142	155	piwi	843	0.38	0.76	0.28	0.368421
CG31861	162	piwi	843	0.38	0.72	0.3	0.416667
CG31960	148	piwi	843	0.38	0.73	0.29	0.39726
CG32573	392	piwi	843	0.38	0.63	0.31	0.492063
CG32727	122	piwi	843	0.38	0.76	0.29	0.381579
CG33226	292	piwi	843	0.38	0.64	0.31	0.484375
CG33299	193	piwi	843	0.38	0.73	0.29	0.39726
CG34141	755	piwi	843	0.38	0.53	0.34	0.641509
CG34166	82	piwi	843	0.38	0.78	0.28	0.358974
CG34446	61	piwi	843	0.38	0.8	0.28	0.35
CG3528	235	piwi	843	0.38	0.71	0.3	0.422535
CG3546	630	piwi	843	0.38	0.55	0.33	0.6
CG42245	151	piwi	843	0.38	0.73	0.29	0.39726
CG42496	94	piwi	843	0.38	0.79	0.28	0.35443
CG42586	89	piwi	843	0.38	0.77	0.28	0.363636
CG42673	904	piwi	843	0.38	0.51	0.35	0.686275
CG4281	696	piwi	843	0.38	0.55	0.34	0.618182
CG43192	170	piwi	843	0.38	0.71	0.29	0.408451
CG43229	82	piwi	843	0.38	0.78	0.28	0.358974
CG43349	70	piwi	843	0.38	0.78	0.28	0.358974
CG43775	272	piwi	843	0.38	0.66	0.31	0.469697
CG4438	189	piwi	843	0.38	0.74	0.29	0.391892
CG4440	79	piwi	843	0.38	0.77	0.28	0.363636
CG45207	65	piwi	843	0.38	0.78	0.28	0.358974
CG5172	172	piwi	843	0.38	0.7	0.3	0.428571
CG5973	311	piwi	843	0.38	0.67	0.3	0.447761
CG6044	229	piwi	843	0.38	0.72	0.3	0.416667
CG6277	341	piwi	843	0.38	0.67	0.31	0.462687
CG6685	213	piwi	843	0.38	0.72	0.3	0.416667
CG6709	117	piwi	843	0.38	0.77	0.28	0.363636
CG6983	180	piwi	843	0.38	0.72	0.29	0.402778
CG7215	130	piwi	843	0.38	0.77	0.28	0.363636
CG7668	422	piwi	843	0.38	0.61	0.32	0.52459
CG8138	233	piwi	843	0.38	0.72	0.3	0.416667
CG8420	531	piwi	843	0.38	0.63	0.32	0.507937
CG8738	459	piwi	843	0.38	0.6	0.32	0.533333
CG9933	376	piwi	843	0.38	0.64	0.31	0.484375
Claspin	1465	piwi	843	0.38	0.44	0.37	0.840909
CSN1b	525	piwi	843	0.38	0.57	0.33	0.578947
Dbp21E2	536	piwi	843	0.38	0.62	0.32	0.516129
Dcp-1	323	piwi	843	0.38	0.64	0.31	0.484375
dmrt93B	325	piwi	843	0.38	0.66	0.31	0.469697
Eaf	504	piwi	843	0.38	0.6	0.33	0.55
Eb1	297	piwi	843	0.38	0.63	0.31	0.492063
etaTry	262	piwi	843	0.38	0.69	0.31	0.449275
Golgin245	1489	piwi	843	0.38	0.43	0.37	0.860465
Gr10b	373	piwi	843	0.38	0.66	0.32	0.484848
Gr66a	527	piwi	843	0.38	0.61	0.32	0.52459
hebe	456	piwi	843	0.38	0.6	0.32	0.533333
HLH3B	376	piwi	843	0.38	0.62	0.31	0.5
HSPC300	76	piwi	843	0.38	0.78	0.29	0.371795
Ide	990	piwi	843	0.38	0.58	0.33	0.568966
ix	188	piwi	843	0.38	0.74	0.29	0.391892
lsn	254	piwi	843	0.38	0.71	0.3	0.422535
Lst8	313	piwi	843	0.38	0.68	0.31	0.455882
mRpL14	161	piwi	843	0.38	0.75	0.29	0.386667
mRpL34	81	piwi	843	0.38	0.79	0.28	0.35443
mrva	478	piwi	843	0.38	0.63	0.32	0.507937
mthl5	497	piwi	843	0.38	0.6	0.32	0.533333
NimA	565	piwi	843	0.38	0.58	0.33	0.568966
Nmnat	389	piwi	843	0.38	0.6	0.32	0.533333
Nrd1	1147	piwi	843	0.38	0.56	0.34	0.607143
Obp84a	221	piwi	843	0.38	0.73	0.29	0.39726
Pgant1	601	piwi	843	0.38	0.55	0.34	0.618182
pgc	71	piwi	843	0.38	0.77	0.28	0.363636
Pka-C3	583	piwi	843	0.38	0.54	0.33	0.611111
Polr3G	211	piwi	843	0.38	0.72	0.3	0.416667
prod	346	piwi	843	0.38	0.65	0.31	0.476923
Prp18	340	piwi	843	0.38	0.66	0.31	0.469697
psd	381	piwi	843	0.38	0.64	0.32	0.5
Rab8	207	piwi	843	0.38	0.69	0.3	0.434783
Rh6	369	piwi	843	0.38	0.61	0.33	0.540984
robl62A	104	piwi	843	0.38	0.77	0.28	0.363636
RpLP2	113	piwi	843	0.38	0.73	0.29	0.39726
RpS14a	151	piwi	843	0.38	0.73	0.29	0.39726
RpS14b	151	piwi	843	0.38	0.73	0.29	0.39726
RpS29	56	piwi	843	0.38	0.78	0.28	0.358974
Rpt6	405	piwi	843	0.38	0.65	0.32	0.492308
Ser12	245	piwi	843	0.38	0.71	0.3	0.422535
Ser6	259	piwi	843	0.38	0.69	0.31	0.449275
Sfp24Bb	110	piwi	843	0.38	0.77	0.28	0.363636
Sfp53D	159	piwi	843	0.38	0.75	0.29	0.386667
Snap29	284	piwi	843	0.38	0.68	0.3	0.441176
Spn88Eb	426	piwi	843	0.38	0.65	0.31	0.476923
Srp14	109	piwi	843	0.38	0.78	0.27	0.346154
Ssk	162	piwi	843	0.38	0.74	0.28	0.378378
stg1	1000	piwi	843	0.38	0.5	0.35	0.7
sun	61	piwi	843	0.38	0.81	0.28	0.345679
Swt1	404	piwi	843	0.38	0.61	0.32	0.52459
t-Grip84	728	piwi	843	0.38	0.55	0.33	0.6
Taf13	136	piwi	843	0.38	0.75	0.29	0.386667
Tcs6	111	piwi	843	0.38	0.76	0.29	0.381579
tex	320	piwi	843	0.38	0.62	0.32	0.516129
Tim8	88	piwi	843	0.38	0.78	0.28	0.358974
Tim9a	95	piwi	843	0.38	0.76	0.29	0.381579
Tina-1	167	piwi	843	0.38	0.74	0.29	0.391892
tld	1067	piwi	843	0.38	0.5	0.34	0.68
Trs31	194	piwi	843	0.38	0.73	0.29	0.39726
tsg	249	piwi	843	0.38	0.71	0.3	0.422535
Ubc7	167	piwi	843	0.38	0.73	0.3	0.410959
uzip	488	piwi	843	0.38	0.63	0.31	0.492063
Alp1	530	piwi	843	0.37	0.6	0.31	0.516667
AnxB10	321	piwi	843	0.37	0.67	0.29	0.432836
Arl5	179	piwi	843	0.37	0.73	0.28	0.383562
AstCC	261	piwi	843	0.37	0.67	0.29	0.432836
Atg5	269	piwi	843	0.37	0.71	0.28	0.394366
atilla	143	piwi	843	0.37	0.75	0.28	0.373333
Bet1	117	piwi	843	0.37	0.77	0.27	0.350649
boi	1105	piwi	843	0.37	0.49	0.34	0.693878
BomBc3	98	piwi	843	0.37	0.76	0.28	0.368421
btl	1052	piwi	843	0.37	0.5	0.33	0.66
bves	414	piwi	843	0.37	0.6	0.31	0.516667
Caper	594	piwi	843	0.37	0.55	0.32	0.581818
CG10055	608	piwi	843	0.37	0.56	0.32	0.571429
CG10311	165	piwi	843	0.37	0.75	0.28	0.373333
CG10822	114	piwi	843	0.37	0.76	0.28	0.368421
CG10866	224	piwi	843	0.37	0.72	0.28	0.388889
CG10907	502	piwi	843	0.37	0.61	0.31	0.508197
CG10949	459	piwi	843	0.37	0.6	0.31	0.516667
CG11035	231	piwi	843	0.37	0.68	0.29	0.426471
CG11170	348	piwi	843	0.37	0.63	0.31	0.492063
CG11381	436	piwi	843	0.37	0.61	0.31	0.508197
CG12159	202	piwi	843	0.37	0.7	0.29	0.414286
CG12617	96	piwi	843	0.37	0.77	0.27	0.350649
CG12780	100	piwi	843	0.37	0.77	0.27	0.350649
CG12991	469	piwi	843	0.37	0.61	0.31	0.508197
CG12995	173	piwi	843	0.37	0.7	0.28	0.4
CG13047	170	piwi	843	0.37	0.72	0.28	0.388889
CG13581	208	piwi	843	0.37	0.71	0.29	0.408451
CG13711	127	piwi	843	0.37	0.74	0.28	0.378378
CG13955	326	piwi	843	0.37	0.67	0.3	0.447761
CG14022	101	piwi	843	0.37	0.74	0.28	0.378378
CG14074	336	piwi	843	0.37	0.65	0.3	0.461538
CG14187	126	piwi	843	0.37	0.75	0.27	0.36
CG14492	199	piwi	843	0.37	0.73	0.28	0.383562
CG14642	392	piwi	843	0.37	0.61	0.31	0.508197
CG14683	356	piwi	843	0.37	0.66	0.29	0.439394
CG15118	637	piwi	843	0.37	0.54	0.33	0.611111
CG15202	115	piwi	843	0.37	0.76	0.28	0.368421
CG15365	828	piwi	843	0.37	0.53	0.33	0.622642
CG15368	162	piwi	843	0.37	0.73	0.28	0.383562
CG17047	392	piwi	843	0.37	0.64	0.3	0.46875
CG17122	598	piwi	843	0.37	0.55	0.33	0.6
CG17141	323	piwi	843	0.37	0.66	0.3	0.454545
CG18367	93	piwi	843	0.37	0.79	0.27	0.341772
CG18371	110	piwi	843	0.37	0.76	0.27	0.355263
CG2162	662	piwi	843	0.37	0.57	0.32	0.561404
CG2921	478	piwi	843	0.37	0.63	0.31	0.492063
CG30285	112	piwi	843	0.37	0.75	0.27	0.36
CG30291	509	piwi	843	0.37	0.57	0.32	0.561404
CG31323	169	piwi	843	0.37	0.73	0.28	0.383562
CG31698	151	piwi	843	0.37	0.73	0.28	0.383562
CG31827	294	piwi	843	0.37	0.66	0.29	0.439394
CG31870	79	piwi	843	0.37	0.8	0.27	0.3375
CG32109	231	piwi	843	0.37	0.71	0.29	0.408451
CG32225	295	piwi	843	0.37	0.66	0.29	0.439394
CG32444	370	piwi	843	0.37	0.66	0.3	0.454545
CG32447	658	piwi	843	0.37	0.55	0.33	0.6
CG32537	347	piwi	843	0.37	0.64	0.3	0.46875
CG32718	261	piwi	843	0.37	0.66	0.29	0.439394
CG33003	604	piwi	843	0.37	0.58	0.32	0.551724
CG34026	117	piwi	843	0.37	0.78	0.26	0.333333
CG34132	84	piwi	843	0.37	0.78	0.27	0.346154
CG34175	86	piwi	843	0.37	0.76	0.27	0.355263
CG3500	198	piwi	843	0.37	0.72	0.28	0.388889
CG3687	143	piwi	843	0.37	0.75	0.28	0.373333
CG41562	213	piwi	843	0.37	0.71	0.28	0.394366
CG42323	259	piwi	843	0.37	0.69	0.3	0.434783
CG42590	280	piwi	843	0.37	0.66	0.3	0.454545
CG42729	185	piwi	843	0.37	0.74	0.28	0.378378
CG4297	1472	piwi	843	0.37	0.44	0.36	0.818182
CG43841	75	piwi	843	0.37	0.76	0.27	0.355263
CG4461	200	piwi	843	0.37	0.72	0.28	0.388889
CG4497	506	piwi	843	0.37	0.6	0.31	0.516667
CG46399	196	piwi	843	0.37	0.69	0.29	0.42029
CG46434	296	piwi	843	0.37	0.65	0.3	0.461538
CG46522	213	piwi	843	0.37	0.73	0.28	0.383562
CG4770	490	piwi	843	0.37	0.62	0.31	0.5
CG5355	756	piwi	843	0.37	0.51	0.34	0.666667
CG7407	168	piwi	843	0.37	0.73	0.29	0.39726
CG7519	160	piwi	843	0.37	0.75	0.28	0.373333
CG7968	250	piwi	843	0.37	0.68	0.29	0.426471
CG7974	294	piwi	843	0.37	0.68	0.29	0.426471
CG8043	348	piwi	843	0.37	0.67	0.29	0.432836
CG8646	562	piwi	843	0.37	0.6	0.31	0.516667
CG8958	621	piwi	843	0.37	0.57	0.32	0.561404
CG9034	77	piwi	843	0.37	0.79	0.27	0.341772
CG9582	300	piwi	843	0.37	0.66	0.3	0.454545
Cht8	476	piwi	843	0.37	0.57	0.32	0.561404
Clic	260	piwi	843	0.37	0.66	0.3	0.454545
Crz	154	piwi	843	0.37	0.73	0.28	0.383562
Dd	243	piwi	843	0.37	0.7	0.29	0.414286
eca	216	piwi	843	0.37	0.72	0.29	0.402778
eIF3j	236	piwi	843	0.37	0.72	0.28	0.388889
emc	199	piwi	843	0.37	0.72	0.28	0.388889
Gart	1353	piwi	843	0.37	0.56	0.32	0.571429
Gr93d	381	piwi	843	0.37	0.66	0.3	0.454545
HemK1	323	piwi	843	0.37	0.66	0.29	0.439394
Hex-C	454	piwi	843	0.37	0.63	0.31	0.492063
hog	149	piwi	843	0.37	0.74	0.28	0.378378
Idgf3	441	piwi	843	0.37	0.6	0.31	0.516667
Ifrd1	425	piwi	843	0.37	0.6	0.31	0.516667
inaF-A	89	piwi	843	0.37	0.77	0.26	0.337662
LSm1	137	piwi	843	0.37	0.75	0.28	0.373333
Lsm10	141	piwi	843	0.37	0.74	0.28	0.378378
mil	283	piwi	843	0.37	0.66	0.29	0.439394
Ndfip	267	piwi	843	0.37	0.7	0.29	0.414286
NimB5	315	piwi	843	0.37	0.67	0.3	0.447761
Nplp4	64	piwi	843	0.37	0.8	0.26	0.325
pb	782	piwi	843	0.37	0.52	0.33	0.634615
PI31	270	piwi	843	0.37	0.66	0.3	0.454545
Polr2H	149	piwi	843	0.37	0.76	0.28	0.368421
PpD5	346	piwi	843	0.37	0.65	0.29	0.446154
ppk20	587	piwi	843	0.37	0.6	0.31	0.516667
Ptpa	398	piwi	843	0.37	0.65	0.3	0.461538
Pus1	442	piwi	843	0.37	0.63	0.31	0.492063
Rab39	218	piwi	843	0.37	0.7	0.29	0.414286
Rnf146	448	piwi	843	0.37	0.61	0.32	0.52459
RpL37A	92	piwi	843	0.37	0.76	0.28	0.368421
RpLP1	112	piwi	843	0.37	0.72	0.28	0.388889
Rrp40	232	piwi	843	0.37	0.71	0.28	0.394366
Sbat	121	piwi	843	0.37	0.76	0.28	0.368421
SCCRO	297	piwi	843	0.37	0.69	0.29	0.42029
Sec61alpha	476	piwi	843	0.37	0.63	0.3	0.47619
Sfp24Ba	121	piwi	843	0.37	0.77	0.27	0.350649
Sh3beta	485	piwi	843	0.37	0.6	0.32	0.533333
side-VI	1087	piwi	843	0.37	0.47	0.35	0.744681
Sil1	429	piwi	843	0.37	0.62	0.3	0.483871
sinah	351	piwi	843	0.37	0.61	0.31	0.508197
Slimp	464	piwi	843	0.37	0.62	0.31	0.5
spn-F	376	piwi	843	0.37	0.63	0.31	0.492063
squ	241	piwi	843	0.37	0.7	0.29	0.414286
Srp9	77	piwi	843	0.37	0.8	0.26	0.325
sty	589	piwi	843	0.37	0.58	0.32	0.551724
Surf6	324	piwi	843	0.37	0.67	0.3	0.447761
tra	197	piwi	843	0.37	0.7	0.29	0.414286
Trs33	152	piwi	843	0.37	0.75	0.28	0.373333
Tsp42Eg	218	piwi	843	0.37	0.71	0.28	0.394366
U2af38	264	piwi	843	0.37	0.69	0.28	0.405797
Vha14-1	124	piwi	843	0.37	0.78	0.26	0.333333
Vha14-2	129	piwi	843	0.37	0.77	0.28	0.363636
wdp	677	piwi	843	0.37	0.54	0.32	0.592593
wus	406	piwi	843	0.37	0.62	0.3	0.483871
Acbp1	90	piwi	843	0.36	0.76	0.26	0.342105
Acp63F	81	piwi	843	0.36	0.79	0.25	0.316456
Ance-3	844	piwi	843	0.36	0.49	0.33	0.673469
Arf1	182	piwi	843	0.36	0.73	0.27	0.369863
BORCS6	302	piwi	843	0.36	0.66	0.29	0.439394
Bulli	642	piwi	843	0.36	0.58	0.31	0.534483
CG10189	405	piwi	843	0.36	0.62	0.29	0.467742
CG10336	307	piwi	843	0.36	0.69	0.28	0.405797
CG11843	316	piwi	843	0.36	0.67	0.29	0.432836
CG11975	340	piwi	843	0.36	0.66	0.29	0.439394
CG12229	571	piwi	843	0.36	0.61	0.29	0.47541
CG12464	125	piwi	843	0.36	0.77	0.26	0.337662
CG12535	205	piwi	843	0.36	0.71	0.27	0.380282
CG12637	292	piwi	843	0.36	0.68	0.28	0.411765
CG12898	156	piwi	843	0.36	0.75	0.26	0.346667
CG12910	466	piwi	843	0.36	0.62	0.3	0.483871
CG12920	372	piwi	843	0.36	0.63	0.29	0.460317
CG13074	451	piwi	843	0.36	0.66	0.29	0.439394
CG13171	106	piwi	843	0.36	0.75	0.26	0.346667
CG13288	273	piwi	843	0.36	0.67	0.28	0.41791
CG13748	113	piwi	843	0.36	0.76	0.26	0.342105
CG13896	252	piwi	843	0.36	0.68	0.29	0.426471
CG14324	131	piwi	843	0.36	0.74	0.26	0.351351
CG14440	318	piwi	843	0.36	0.67	0.28	0.41791
CG14505	119	piwi	843	0.36	0.76	0.26	0.342105
CG14695	289	piwi	843	0.36	0.7	0.28	0.4
CG15208	365	piwi	843	0.36	0.66	0.29	0.439394
CG15312	464	piwi	843	0.36	0.61	0.3	0.491803
CG15449	131	piwi	843	0.36	0.76	0.26	0.342105
CG15471	128	piwi	843	0.36	0.76	0.26	0.342105
CG15472	301	piwi	843	0.36	0.69	0.28	0.405797
CG15531	334	piwi	843	0.36	0.65	0.28	0.430769
CG15916	271	piwi	843	0.36	0.67	0.28	0.41791
CG16700	468	piwi	843	0.36	0.61	0.29	0.47541
CG16824	64	piwi	843	0.36	0.8	0.25	0.3125
CG16894	266	piwi	843	0.36	0.7	0.27	0.385714
CG17162	274	piwi	843	0.36	0.67	0.28	0.41791
CG17327	139	piwi	843	0.36	0.74	0.27	0.364865
CG17508	321	piwi	843	0.36	0.67	0.29	0.432836
CG17672	249	piwi	843	0.36	0.71	0.27	0.380282
CG17760	353	piwi	843	0.36	0.65	0.29	0.446154
CG17764	272	piwi	843	0.36	0.67	0.29	0.432836
CG17917	211	piwi	843	0.36	0.7	0.28	0.4
CG1812	616	piwi	843	0.36	0.58	0.3	0.517241
CG2021	95	piwi	843	0.36	0.78	0.26	0.333333
CG2182	671	piwi	843	0.36	0.59	0.31	0.525424
CG2528	731	piwi	843	0.36	0.52	0.32	0.615385
CG30056	137	piwi	843	0.36	0.75	0.27	0.36
CG30344	507	piwi	843	0.36	0.57	0.3	0.526316
CG30413	122	piwi	843	0.36	0.75	0.26	0.346667
CG31226	52	piwi	843	0.36	0.77	0.26	0.337662
CG31468	80	piwi	843	0.36	0.78	0.26	0.333333
CG31482	195	piwi	843	0.36	0.7	0.27	0.385714
CG31612	987	piwi	843	0.36	0.48	0.32	0.666667
CG32095	429	piwi	843	0.36	0.61	0.29	0.47541
CG32755	315	piwi	843	0.36	0.63	0.29	0.460317
CG33263	227	piwi	843	0.36	0.71	0.27	0.380282
CG34007	94	piwi	843	0.36	0.76	0.26	0.342105
CG34160	71	piwi	843	0.36	0.76	0.26	0.342105
CG34162	535	piwi	843	0.36	0.59	0.3	0.508475
CG3420	136	piwi	843	0.36	0.75	0.27	0.36
CG34213	139	piwi	843	0.36	0.75	0.26	0.346667
CG34263	85	piwi	843	0.36	0.79	0.25	0.316456
CG34269	191	piwi	843	0.36	0.73	0.27	0.369863
CG34289	114	piwi	843	0.36	0.75	0.26	0.346667
CG34382	805	piwi	843	0.36	0.51	0.33	0.647059
CG3760	271	piwi	843	0.36	0.68	0.27	0.397059
CG3817	276	piwi	843	0.36	0.68	0.28	0.411765
CG42239	69	piwi	843	0.36	0.77	0.26	0.337662
CG42375	80	piwi	843	0.36	0.8	0.25	0.3125
CG42376	92	piwi	843	0.36	0.79	0.26	0.329114
CG42544	120	piwi	843	0.36	0.73	0.27	0.369863
CG42812	217	piwi	843	0.36	0.71	0.27	0.380282
CG43069	79	piwi	843	0.36	0.78	0.25	0.320513
CG43293	103	piwi	843	0.36	0.73	0.27	0.369863
CG43796	127	piwi	843	0.36	0.74	0.26	0.351351
CG43798	213	piwi	843	0.36	0.7	0.28	0.4
CG4577	446	piwi	843	0.36	0.61	0.29	0.47541
CG4622	553	piwi	843	0.36	0.57	0.31	0.54386
CG4716	223	piwi	843	0.36	0.68	0.28	0.411765
CG4962	123	piwi	843	0.36	0.75	0.26	0.346667
CG5039	111	piwi	843	0.36	0.75	0.26	0.346667
CG5122	1263	piwi	843	0.36	0.5	0.33	0.66
CG5439	520	piwi	843	0.36	0.6	0.3	0.5
CG6149	234	piwi	843	0.36	0.7	0.28	0.4
CG6592	438	piwi	843	0.36	0.59	0.3	0.508475
CG6610	91	piwi	843	0.36	0.78	0.26	0.333333
CG6873	148	piwi	843	0.36	0.74	0.26	0.351351
CG6891	163	piwi	843	0.36	0.74	0.26	0.351351
CG7741	545	piwi	843	0.36	0.6	0.29	0.483333
CG7992	480	piwi	843	0.36	0.62	0.29	0.467742
CG8206	191	piwi	843	0.36	0.73	0.26	0.356164
CG8300	185	piwi	843	0.36	0.75	0.26	0.346667
CG8613	808	piwi	843	0.36	0.52	0.32	0.615385
CG9624	289	piwi	843	0.36	0.69	0.27	0.391304
CheB38a	197	piwi	843	0.36	0.71	0.27	0.380282
Clc	219	piwi	843	0.36	0.7	0.28	0.4
Cnep1r1	123	piwi	843	0.36	0.76	0.26	0.342105
cold	153	piwi	843	0.36	0.74	0.27	0.364865
cort	483	piwi	843	0.36	0.61	0.3	0.491803
COX7C	66	piwi	843	0.36	0.78	0.26	0.333333
cpx	157	piwi	843	0.36	0.76	0.26	0.342105
D1	355	piwi	843	0.36	0.65	0.29	0.446154
dls	176	piwi	843	0.36	0.73	0.27	0.369863
EAChm	211	piwi	843	0.36	0.68	0.28	0.411765
eEF1beta	222	piwi	843	0.36	0.69	0.28	0.405797
EloB	118	piwi	843	0.36	0.76	0.26	0.342105
emei	496	piwi	843	0.36	0.63	0.29	0.460317
FBXO11	1182	piwi	843	0.36	0.46	0.34	0.73913
Fst	286	piwi	843	0.36	0.68	0.28	0.411765
FucTA	503	piwi	843	0.36	0.63	0.3	0.47619
GNBP3	490	piwi	843	0.36	0.61	0.3	0.491803
Gr28b	470	piwi	843	0.36	0.62	0.3	0.483871
HDAC1	521	piwi	843	0.36	0.56	0.31	0.553571
His4r	103	piwi	843	0.36	0.76	0.26	0.342105
Hrb98DE	365	piwi	843	0.36	0.67	0.29	0.432836
Ir94g	545	piwi	843	0.36	0.57	0.3	0.526316
IRSp53	1076	piwi	843	0.36	0.47	0.34	0.723404
Jasper	475	piwi	843	0.36	0.64	0.28	0.4375
Jon25Bii	276	piwi	843	0.36	0.69	0.28	0.405797
karr	97	piwi	843	0.36	0.75	0.26	0.346667
Kaz1-ORFB	115	piwi	843	0.36	0.77	0.26	0.337662
LBR	741	piwi	843	0.36	0.58	0.3	0.517241
Lerp	918	piwi	843	0.36	0.51	0.32	0.627451
lmgB	365	piwi	843	0.36	0.63	0.29	0.460317
LTV1	493	piwi	843	0.36	0.61	0.3	0.491803
M6	368	piwi	843	0.36	0.63	0.29	0.460317
Mapmodulin	363	piwi	843	0.36	0.66	0.29	0.439394
Mgat1	458	piwi	843	0.36	0.65	0.29	0.446154
Mlc-c	153	piwi	843	0.36	0.72	0.26	0.361111
mRpL21	201	piwi	843	0.36	0.7	0.28	0.4
MtnF	64	piwi	843	0.36	0.79	0.26	0.329114
mtsh	649	piwi	843	0.36	0.56	0.3	0.535714
ninaA	237	piwi	843	0.36	0.68	0.28	0.411765
noi	503	piwi	843	0.36	0.59	0.31	0.525424
nsl1	1570	piwi	843	0.36	0.42	0.35	0.833333
nudE	377	piwi	843	0.36	0.64	0.28	0.4375
par-6	351	piwi	843	0.36	0.62	0.29	0.467742
Pgant5	630	piwi	843	0.36	0.54	0.32	0.592593
PH4alphaNE1	537	piwi	843	0.36	0.55	0.31	0.563636
pirk	197	piwi	843	0.36	0.71	0.27	0.380282
ppk7	573	piwi	843	0.36	0.58	0.31	0.534483
Pvf1	325	piwi	843	0.36	0.68	0.28	0.411765
r2d2	311	piwi	843	0.36	0.7	0.27	0.385714
ringer	192	piwi	843	0.36	0.73	0.27	0.369863
rush	316	piwi	843	0.36	0.67	0.28	0.41791
S	597	piwi	843	0.36	0.56	0.31	0.553571
sala	142	piwi	843	0.36	0.72	0.27	0.375
Sb	787	piwi	843	0.36	0.56	0.32	0.571429
scpr-B	262	piwi	843	0.36	0.69	0.27	0.391304
Sfp24C1	80	piwi	843	0.36	0.77	0.26	0.337662
sigmar	210	piwi	843	0.36	0.71	0.28	0.394366
SmydA-3	507	piwi	843	0.36	0.57	0.31	0.54386
sNPF	281	piwi	843	0.36	0.67	0.28	0.41791
Sod2	217	piwi	843	0.36	0.71	0.27	0.380282
Spec2	85	piwi	843	0.36	0.77	0.25	0.324675
Srp19	160	piwi	843	0.36	0.76	0.26	0.342105
Sse	634	piwi	843	0.36	0.59	0.3	0.508475
step	727	piwi	843	0.36	0.55	0.31	0.563636
Syngr	241	piwi	843	0.36	0.71	0.28	0.394366
tai	2047	piwi	843	0.36	0.41	0.34	0.829268
Task7	340	piwi	843	0.36	0.64	0.29	0.453125
TBCB	244	piwi	843	0.36	0.66	0.29	0.439394
Tmhs	265	piwi	843	0.36	0.7	0.27	0.385714
Trxr-2	516	piwi	843	0.36	0.59	0.31	0.525424
Ufc1	164	piwi	843	0.36	0.75	0.27	0.36
Unc50	275	piwi	843	0.36	0.7	0.27	0.385714
wds	361	piwi	843	0.36	0.63	0.3	0.47619
zld	1596	piwi	843	0.36	0.43	0.35	0.813953
AANATL7	228	piwi	843	0.35	0.72	0.26	0.361111
ab	904	piwi	843	0.35	0.5	0.31	0.62
Adhr	272	piwi	843	0.35	0.64	0.27	0.421875
alpha-Man-Ic	526	piwi	843	0.35	0.59	0.29	0.491525
Atg4b	668	piwi	843	0.35	0.54	0.3	0.555556
bap	382	piwi	843	0.35	0.63	0.27	0.428571
Bdbt	286	piwi	843	0.35	0.68	0.27	0.397059
BobA	78	piwi	843	0.35	0.78	0.24	0.307692
BOD1	1151	piwi	843	0.35	0.46	0.32	0.695652
bou	149	piwi	843	0.35	0.75	0.24	0.32
CAH8	303	piwi	843	0.35	0.65	0.28	0.430769
CanB	170	piwi	843	0.35	0.71	0.26	0.366197
CARPB	327	piwi	843	0.35	0.66	0.27	0.409091
CG10041	287	piwi	843	0.35	0.65	0.27	0.415385
CG10177	411	piwi	843	0.35	0.64	0.28	0.4375
CG10347	580	piwi	843	0.35	0.57	0.29	0.508772
CG10623	331	piwi	843	0.35	0.67	0.27	0.402985
CG10853	155	piwi	843	0.35	0.72	0.26	0.361111
CG10911	359	piwi	843	0.35	0.65	0.28	0.430769
CG11342	238	piwi	843	0.35	0.7	0.26	0.371429
CG11368	65	piwi	843	0.35	0.78	0.24	0.307692
CG11581	334	piwi	843	0.35	0.64	0.27	0.421875
CG11597	317	piwi	843	0.35	0.67	0.27	0.402985
CG11658	351	piwi	843	0.35	0.67	0.27	0.402985
CG11693	323	piwi	843	0.35	0.65	0.28	0.430769
CG12123	218	piwi	843	0.35	0.72	0.25	0.347222
CG12321	247	piwi	843	0.35	0.69	0.27	0.391304
CG12828	97	piwi	843	0.35	0.75	0.25	0.333333
CG12831	259	piwi	843	0.35	0.67	0.27	0.402985
CG12998	113	piwi	843	0.35	0.75	0.26	0.346667
CG13148	370	piwi	843	0.35	0.63	0.28	0.444444
CG13198	180	piwi	843	0.35	0.73	0.25	0.342466
CG13245	80	piwi	843	0.35	0.76	0.24	0.315789
CG13247	352	piwi	843	0.35	0.66	0.27	0.409091
CG13312	342	piwi	843	0.35	0.65	0.27	0.415385
CG13323	112	piwi	843	0.35	0.77	0.25	0.324675
CG13376	204	piwi	843	0.35	0.7	0.26	0.371429
CG13386	284	piwi	843	0.35	0.66	0.27	0.409091
CG13506	503	piwi	843	0.35	0.57	0.3	0.526316
CG13557	103	piwi	843	0.35	0.75	0.24	0.32
CG13912	162	piwi	843	0.35	0.71	0.26	0.366197
CG14142	447	piwi	843	0.35	0.64	0.27	0.421875
CG14153	237	piwi	843	0.35	0.69	0.27	0.391304
CG14258	258	piwi	843	0.35	0.69	0.27	0.391304
CG14285	297	piwi	843	0.35	0.66	0.27	0.409091
CG14332	124	piwi	843	0.35	0.74	0.26	0.351351
CG14346	206	piwi	843	0.35	0.72	0.26	0.361111
CG14664	84	piwi	843	0.35	0.76	0.24	0.315789
CG14752	112	piwi	843	0.35	0.76	0.25	0.328947
CG14820	416	piwi	843	0.35	0.64	0.27	0.421875
CG15337	405	piwi	843	0.35	0.62	0.28	0.451613
CG15390	275	piwi	843	0.35	0.67	0.27	0.402985
CG15418	97	piwi	843	0.35	0.75	0.25	0.333333
CG15890	599	piwi	843	0.35	0.55	0.3	0.545455
CG15891	149	piwi	843	0.35	0.74	0.26	0.351351
CG1677	1000	piwi	843	0.35	0.5	0.31	0.62
CG17266	183	piwi	843	0.35	0.72	0.25	0.347222
CG1792	372	piwi	843	0.35	0.64	0.28	0.4375
CG18507	514	piwi	843	0.35	0.61	0.28	0.459016
CG18538	182	piwi	843	0.35	0.74	0.26	0.351351
CG2082	368	piwi	843	0.35	0.67	0.27	0.402985
CG30050	192	piwi	843	0.35	0.73	0.25	0.342466
CG30105	155	piwi	843	0.35	0.74	0.25	0.337838
CG30268	1240	piwi	843	0.35	0.64	0.28	0.4375
CG31345	213	piwi	843	0.35	0.7	0.26	0.371429
CG31515	129	piwi	843	0.35	0.75	0.25	0.333333
CG32115	475	piwi	843	0.35	0.64	0.28	0.4375
CG32276	64	piwi	843	0.35	0.81	0.23	0.283951
CG32462	284	piwi	843	0.35	0.69	0.26	0.376812
CG32669	604	piwi	843	0.35	0.59	0.29	0.491525
CG32706	230	piwi	843	0.35	0.73	0.26	0.356164
CG32817	121	piwi	843	0.35	0.76	0.25	0.328947
CG32971	145	piwi	843	0.35	0.75	0.25	0.333333
CG33631	195	piwi	843	0.35	0.72	0.26	0.361111
CG33642	187	piwi	843	0.35	0.73	0.25	0.342466
CG33687	169	piwi	843	0.35	0.72	0.25	0.347222
CG33688	175	piwi	843	0.35	0.73	0.26	0.356164
CG33689	178	piwi	843	0.35	0.72	0.25	0.347222
CG34136	77	piwi	843	0.35	0.77	0.24	0.311688
CG34276	91	piwi	843	0.35	0.75	0.25	0.333333
CG34298	139	piwi	843	0.35	0.74	0.25	0.337838
CG3513	88	piwi	843	0.35	0.76	0.24	0.315789
CG3581	253	piwi	843	0.35	0.68	0.27	0.397059
CG3589	509	piwi	843	0.35	0.57	0.3	0.526316
CG40228	82	piwi	843	0.35	0.77	0.24	0.311688
CG40635	88	piwi	843	0.35	0.78	0.24	0.307692
CG4168	1330	piwi	843	0.35	0.59	0.29	0.491525
CG42382	180	piwi	843	0.35	0.73	0.26	0.356164
CG42556	257	piwi	843	0.35	0.7	0.26	0.371429
CG42789	100	piwi	843	0.35	0.75	0.25	0.333333
CG42819	146	piwi	843	0.35	0.75	0.25	0.333333
CG43145	73	piwi	843	0.35	0.8	0.23	0.2875
CG43185	54	piwi	843	0.35	0.77	0.25	0.324675
CG43317	246	piwi	843	0.35	0.69	0.27	0.391304
CG43324	66	piwi	843	0.35	0.78	0.24	0.307692
CG43326	123	piwi	843	0.35	0.77	0.25	0.324675
CG43396	153	piwi	843	0.35	0.71	0.26	0.366197
CG44198	57	piwi	843	0.35	0.78	0.25	0.320513
CG4520	320	piwi	843	0.35	0.65	0.27	0.415385
CG4597	225	piwi	843	0.35	0.71	0.26	0.366197
CG4741	207	piwi	843	0.35	0.68	0.26	0.382353
CG4896	949	piwi	843	0.35	0.5	0.31	0.62
CG5819	915	piwi	843	0.35	0.54	0.3	0.555556
CG6125	640	piwi	843	0.35	0.57	0.29	0.508772
CG6696	324	piwi	843	0.35	0.67	0.27	0.402985
CG7794	455	piwi	843	0.35	0.57	0.3	0.526316
CG8010	383	piwi	843	0.35	0.62	0.28	0.451613
CG8230	699	piwi	843	0.35	0.54	0.3	0.555556
CG8399	656	piwi	843	0.35	0.54	0.3	0.555556
CG8483	392	piwi	843	0.35	0.64	0.27	0.421875
CG8500	233	piwi	843	0.35	0.7	0.26	0.371429
CG8568	759	piwi	843	0.35	0.53	0.31	0.584906
CG8813	284	piwi	843	0.35	0.67	0.27	0.402985
CG9393	327	piwi	843	0.35	0.67	0.28	0.41791
CheB42a	198	piwi	843	0.35	0.73	0.25	0.342466
Cnep1r2	131	piwi	843	0.35	0.74	0.26	0.351351
comr	600	piwi	843	0.35	0.58	0.29	0.5
Csl4	204	piwi	843	0.35	0.72	0.26	0.361111
danr	419	piwi	843	0.35	0.62	0.28	0.451613
Dlc90F	111	piwi	843	0.35	0.77	0.24	0.311688
eg	373	piwi	843	0.35	0.63	0.29	0.460317
eIF5	464	piwi	843	0.35	0.59	0.29	0.491525
fat-spondin	763	piwi	843	0.35	0.54	0.3	0.555556
Gas8	479	piwi	843	0.35	0.61	0.28	0.459016
GXIVsPLA2	230	piwi	843	0.35	0.72	0.26	0.361111
IntS12	328	piwi	843	0.35	0.66	0.27	0.409091
Ir68a	704	piwi	843	0.35	0.55	0.3	0.545455
jeb	560	piwi	843	0.35	0.58	0.29	0.5
Lfg	244	piwi	843	0.35	0.69	0.26	0.376812
Med	771	piwi	843	0.35	0.55	0.29	0.527273
mh	724	piwi	843	0.35	0.56	0.3	0.535714
msk	1049	piwi	843	0.35	0.48	0.32	0.666667
mu2	1280	piwi	843	0.35	0.45	0.33	0.733333
ND-15	101	piwi	843	0.35	0.76	0.24	0.315789
ND-B18	117	piwi	843	0.35	0.77	0.25	0.324675
Nepl16	752	piwi	843	0.35	0.57	0.29	0.508772
NimB3	122	piwi	843	0.35	0.74	0.25	0.337838
nkt	162	piwi	843	0.35	0.72	0.26	0.361111
nord	587	piwi	843	0.35	0.61	0.28	0.459016
Nup35	331	piwi	843	0.35	0.65	0.27	0.415385
Obp50c	185	piwi	843	0.35	0.71	0.26	0.366197
Obp50e	196	piwi	843	0.35	0.73	0.25	0.342466
Obp57a	169	piwi	843	0.35	0.72	0.25	0.347222
Odc1	394	piwi	843	0.35	0.63	0.28	0.444444
Orc6	257	piwi	843	0.35	0.71	0.25	0.352113
org-1	699	piwi	843	0.35	0.56	0.3	0.535714
OSCP1	327	piwi	843	0.35	0.69	0.26	0.376812
PIG-K	355	piwi	843	0.35	0.66	0.27	0.409091
Plap	787	piwi	843	0.35	0.55	0.3	0.545455
por	525	piwi	843	0.35	0.62	0.28	0.451613
ppk22	561	piwi	843	0.35	0.6	0.28	0.466667
prd1	1354	piwi	843	0.35	0.44	0.33	0.75
Pur-alpha	275	piwi	843	0.35	0.67	0.27	0.402985
pxb	636	piwi	843	0.35	0.56	0.3	0.535714
Ras85D	189	piwi	843	0.35	0.7	0.26	0.371429
Rnmt	427	piwi	843	0.35	0.64	0.27	0.421875
RpL22-like	312	piwi	843	0.35	0.68	0.27	0.397059
RpS17	131	piwi	843	0.35	0.74	0.26	0.351351
SelR	208	piwi	843	0.35	0.7	0.26	0.371429
Semp1	251	piwi	843	0.35	0.69	0.27	0.391304
Sfp23F	78	piwi	843	0.35	0.78	0.24	0.307692
Shc	409	piwi	843	0.35	0.6	0.29	0.483333
Skeletor	1503	piwi	843	0.35	0.43	0.33	0.767442
Ski6	246	piwi	843	0.35	0.67	0.27	0.402985
SmydA-9	500	piwi	843	0.35	0.57	0.3	0.526316
Sox100B	529	piwi	843	0.35	0.58	0.3	0.517241
sphe	249	piwi	843	0.35	0.68	0.26	0.382353
sra	292	piwi	843	0.35	0.68	0.26	0.382353
ssp	368	piwi	843	0.35	0.64	0.28	0.4375
Syx18	395	piwi	843	0.35	0.63	0.28	0.444444
Tango8	58	piwi	843	0.35	0.77	0.24	0.311688
TfIIA-S-2	107	piwi	843	0.35	0.77	0.24	0.311688
thoc5	616	piwi	843	0.35	0.59	0.29	0.491525
Thor	117	piwi	843	0.35	0.78	0.25	0.320513
tilB	395	piwi	843	0.35	0.64	0.28	0.4375
Tim13	92	piwi	843	0.35	0.79	0.24	0.303797
Tim9b	117	piwi	843	0.35	0.77	0.25	0.324675
Trax	298	piwi	843	0.35	0.68	0.26	0.382353
Tsp42Ek	215	piwi	843	0.35	0.7	0.26	0.371429
UQCR-6.4L	72	piwi	843	0.35	0.78	0.24	0.307692
Victoria	134	piwi	843	0.35	0.75	0.25	0.333333
Vrp1	852	piwi	843	0.35	0.52	0.31	0.596154
wbl	257	piwi	843	0.35	0.71	0.26	0.366197
Wdr82	317	piwi	843	0.35	0.67	0.27	0.402985
XRCC1	614	piwi	843	0.35	0.56	0.3	0.535714
Yp3	420	piwi	843	0.35	0.63	0.28	0.444444
Acbp2	86	piwi	843	0.34	0.74	0.24	0.324324
Acbp4	84	piwi	843	0.34	0.75	0.23	0.306667
Acp62F	115	piwi	843	0.34	0.77	0.23	0.298701
Adat1	394	piwi	843	0.34	0.6	0.27	0.45
agt	194	piwi	843	0.34	0.72	0.24	0.333333
Ak3	216	piwi	843	0.34	0.68	0.25	0.367647
Aladin	466	piwi	843	0.34	0.62	0.27	0.435484
Amun	550	piwi	843	0.34	0.6	0.28	0.466667
aos	444	piwi	843	0.34	0.63	0.26	0.412698
Arpc3A	177	piwi	843	0.34	0.74	0.24	0.324324
Arpc3B	174	piwi	843	0.34	0.75	0.24	0.32
ARY	384	piwi	843	0.34	0.65	0.27	0.415385
asrij	258	piwi	843	0.34	0.68	0.26	0.382353
Atg3	330	piwi	843	0.34	0.66	0.25	0.378788
Atg8b	120	piwi	843	0.34	0.75	0.23	0.306667
ave	106	piwi	843	0.34	0.78	0.23	0.294872
Bace	372	piwi	843	0.34	0.65	0.26	0.4
Brd	81	piwi	843	0.34	0.77	0.23	0.298701
Bub3	326	piwi	843	0.34	0.66	0.26	0.393939
CecA2	63	piwi	843	0.34	0.8	0.23	0.2875
ced-6	533	piwi	843	0.34	0.59	0.28	0.474576
CG10286	625	piwi	843	0.34	0.55	0.29	0.527273
CG10467	364	piwi	843	0.34	0.66	0.27	0.409091
CG10584	274	piwi	843	0.34	0.69	0.25	0.362319
CG10909	349	piwi	843	0.34	0.67	0.26	0.38806
CG10993	210	piwi	843	0.34	0.73	0.24	0.328767
CG11159	146	piwi	843	0.34	0.74	0.24	0.324324
CG11200	355	piwi	843	0.34	0.63	0.26	0.412698
CG1129	369	piwi	843	0.34	0.64	0.26	0.40625
CG11529	287	piwi	843	0.34	0.66	0.25	0.378788
CG11752	109	piwi	843	0.34	0.77	0.23	0.298701
CG12182	694	piwi	843	0.34	0.54	0.29	0.537037
CG12620	287	piwi	843	0.34	0.68	0.25	0.367647
CG12645	206	piwi	843	0.34	0.7	0.25	0.357143
CG12849	172	piwi	843	0.34	0.73	0.24	0.328767
CG12877	991	piwi	843	0.34	0.49	0.3	0.612245
CG12929	142	piwi	843	0.34	0.76	0.24	0.315789
CG13021	110	piwi	843	0.34	0.73	0.24	0.328767
CG13135	132	piwi	843	0.34	0.75	0.24	0.32
CG13202	81	piwi	843	0.34	0.78	0.23	0.294872
CG13315	69	piwi	843	0.34	0.78	0.23	0.294872
CG13361	478	piwi	843	0.34	0.58	0.27	0.465517
CG13465	78	piwi	843	0.34	0.76	0.24	0.315789
CG13603	233	piwi	843	0.34	0.7	0.25	0.357143
CG13699	1051	piwi	843	0.34	0.48	0.3	0.625
CG13877	108	piwi	843	0.34	0.75	0.23	0.306667
CG13901	222	piwi	843	0.34	0.72	0.24	0.333333
CG14275	148	piwi	843	0.34	0.73	0.24	0.328767
CG14330	89	piwi	843	0.34	0.76	0.24	0.315789
CG14764	437	piwi	843	0.34	0.65	0.27	0.415385
CG14777	196	piwi	843	0.34	0.7	0.25	0.357143
CG14957	96	piwi	843	0.34	0.78	0.23	0.294872
[truncated: 10,430 more rows]
